# Supplementary material
Source: PubMed Central journal article supplement (PMC3351932)
Supplement: cr2011133x1.pdf [file cr2011133x1.pdf]

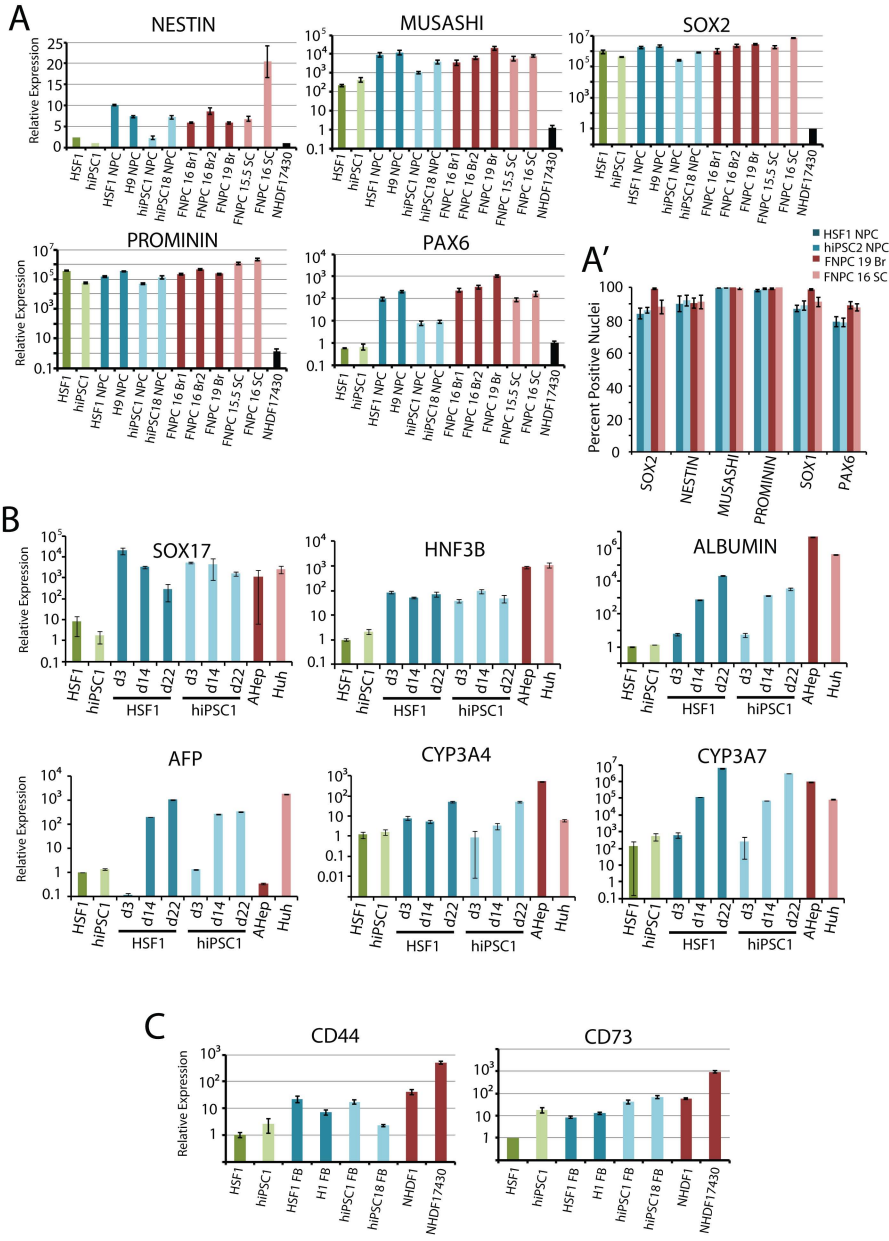

**Figure S1** hESC and hiPSC lines make cell types representing all three germ layers. **A**, RT-PCRs demonstrating mRNA expression of NPC markers (SOX2, NESTIN, MUSASHI, PROMININ, and PAX6) in NPCs derived from PSCs, fetal brain and fetal spinal cord. Error bars represent standard error over 4 replicates. Values set relative to NHDF17430. **A'**, Quantification of the percent positive cells in NPC cultures expressing SOX2, PAX6, MUSASHI, PROMININ, and NESTIN). Error bars represent standard error over 10 fields of view. **B**, RT-PCRs of definitive endoderm markers (SOX17 and HNF3B), fetal hepatocyte markers (AFP and CYP3A7) and adult hepatocyte markers (ALBUMIN and CYP3A4) following 3, 14 and 22 days of directed-differentiation. Error bars represent standard error over 4 replicates. Values set relative to HSF1. **C**, RT-PCR of fibroblast markers (CD44 and CD73) following differentiation of pluripotent stem cells to fibroblasts. Error bars represent standard error over 4 replicates. Values set relative to HSF1.
