# Supplementary material
Source: PubMed Central journal article supplement (PMC3351932)
Supplement: cr2011133x2.pdf [file cr2011133x2.pdf]

A

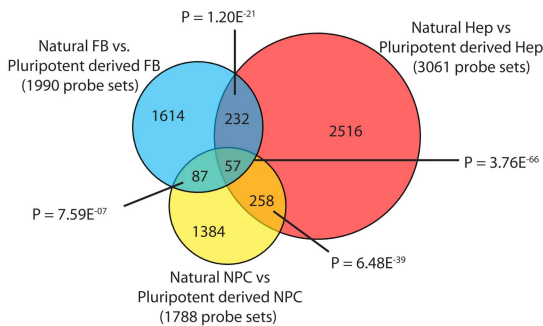

B

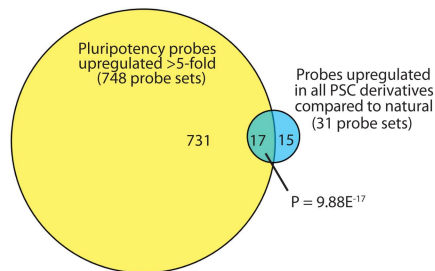

C

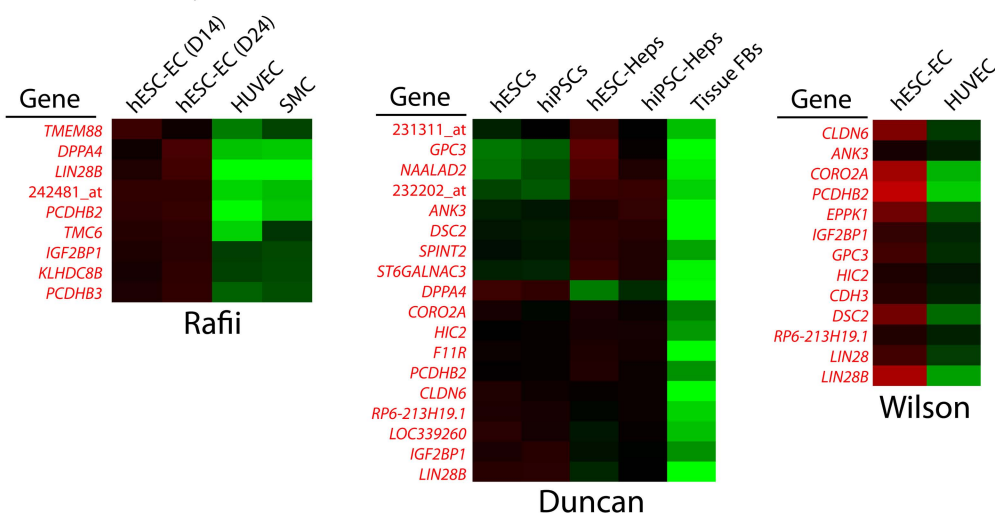

D

## Go Terms: Biological Processes

## NPC

**homophilic cell adhesion;**  
**nervous system development;**  
 developmental process;  
 calcium-dependent cell-cell  
 adhesion

## Hep

**nervous system development;** oxidation reduction; acute inflammatory response;  
 metabolic process; cofactor metabolic process; cellular lipid metabolic process;  
 regulation of RNA metabolic process; regulation of nucleobase, nucleoside,  
 nucleotide; regulation of transcription, DNA-dependent; regulation of transcription;  
 aromatic compound metabolic process; regulation of gene expression; biphenyl  
 metabolic process; bilirubin conjugation; humoral immune response mediated  
 circulating immunoglobulin; activation of plasma proteins during acute  
 inflammatory response; complement activation, classical pathway; complement  
 activation; lipid metabolic process; regulation of macromolecule biosynthetic  
 process; tetrapyrrole catabolic process; porphyrin catabolic process; cellular  
 metabolic process; regulation of biosynthetic process; transcription; regulation of  
 cellular metabolic process; benzene and derivative metabolic process; negative  
 regulation of biosynthetic process; heterocycle metabolic process; regulation of  
 metabolic process; steroid metabolic process; negative regulation of gene  
 expression; biosynthetic process; negative regulation of transcription; negative  
 regulation of nucleobase, nucleoside, nucleotide; regulation of macromolecule  
 metabolic process; tetrapyrrole metabolic process; porphyrin metabolic process

## FB

**homophilic cell adhesion;** cell-cell  
 adhesion

**Figure S2** Gene expression differences between PSC and tissue derivatives are conserved regardless of statistical analyses employed or lab. **A and B**, A similar analysis as shown in Figure 3A and B, but instead using FDR ( $p \leq 0.05$ ) and fold change  $\geq 1.54$  as criteria to determine genes that were differentially expressed. **C**, The same analysis shown in Figure 3C was performed with 3 outside datasets. Outside data sets included: GSE19735 (Rafii), comparing hESC-derived endothelial cell (EC) to human umbilical vein endothelial cells (HUVEC) and human smooth muscle cells (SMC); GSE14897 (Duncan), comparing undifferentiated hESCs and hiPSCs to hepatocytes made from each; and GSE20013 (Wilson), comparing endothelial cells made from hESCs to endothelial cells made from tissue (HUVEC). **D**, Gene Ontology Biological Processes terms identified as different between PSC derivatives and their natural counterparts ( $p < 0.01$ ). Underlined terms were identified in 2 of 3 germ layers. Note: no term was identified in all three germ layers.
