# Supplementary material
Source: PubMed Central journal article supplement (PMC3351932)
Supplement: cr2011133x3.pdf [file cr2011133x3.pdf]

| Probe Set ID | Gene Symbol | hESC (3) |        | hiPSC (6) |        | PSC-Heps (5) |        | Adult-Hep (2) |        |
|--------------|-------------|----------|--------|-----------|--------|--------------|--------|---------------|--------|
|              |             | avg      | stderr | avg       | stderr | avg          | stderr | avg           | stderr |
| 214829_at    | AASS        | 2936     | 215    | 1982      | 316    | 220          | 13     | 314           | 106    |
| 237974_at    | ABHD12B     | 529      | 72     | 204       | 98     | 8            | 0      | 8             | 1      |
| 203872_at    | ACTA1       | 897      | 106    | 1368      | 519    | 657          | 280    | 18            | 0      |
| 205132_at    | ACTC1       | 2724     | 398    | 3937      | 690    | 4382         | 1100   | 125           | 14     |
| 236126_at    | ACVR2B      | 3084     | 42     | 2631      | 168    | 1713         | 141    | 211           | 48     |
| 1553179_at   | ADAMTS19    | 314      | 16     | 316       | 34     | 135          | 35     | 36            | 3      |
| 213217_at    | ADCY2       | 1071     | 44     | 1540      | 266    | 223          | 36     | 50            | 3      |
| 205268_s_at  | ADD2        | 624      | 78     | 789       | 126    | 35           | 3      | 44            | 5      |
| 228771_at    | ADRBK2      | 866      | 38     | 644       | 81     | 575          | 46     | 55            | 13     |
| 223075_s_at  | AIF1L       | 1006     | 59     | 1435      | 179    | 379          | 43     | 46            | 6      |
| 228342_s_at  | ALPK3       | 215      | 32     | 235       | 27     | 1319         | 146    | 169           | 53     |
| 215783_s_at  | ALPL        | 159      | 9      | 460       | 110    | 61           | 11     | 71            | 12     |
| 206385_s_at  | ANK3        | 1363     | 85     | 1379      | 126    | 1438         | 94     | 290           | 164    |
| 209369_at    | ANXA3       | 1028     | 141    | 1699      | 312    | 3550         | 863    | 939           | 427    |
| 218261_at    | AP1M2       | 473      | 19     | 459       | 71     | 392          | 52     | 73            | 6      |
| 228415_at    | AP1S2       | 9974     | 891    | 8598      | 1058   | 1932         | 179    | 408           | 30     |
| 203381_s_at  | APOE        | 3165     | 72     | 2766      | 162    | 8399         | 1069   | 12644         | 6762   |
| 203946_s_at  | ARG2        | 1026     | 28     | 873       | 93     | 1180         | 84     | 303           | 221    |
| 37117_at     | ARHGAP8     | 976      | 48     | 873       | 100    | 2696         | 355    | 142           | 28     |
| 218964_at    | ARID3B      | 936      | 89     | 1249      | 96     | 805          | 64     | 101           | 6      |
| 209464_at    | AURKB       | 1012     | 38     | 915       | 69     | 140          | 18     | 97            | 62     |
| 1555962_at   | B3GNT7      | 509      | 69     | 524       | 56     | 184          | 33     | 40            | 2      |
| 222891_s_at  | BCL11A      | 1297     | 46     | 1032      | 123    | 424          | 75     | 18            | 1      |
| 227920_at    | BEND3       | 1124     | 37     | 873       | 82     | 188          | 20     | 110           | 20     |
| 230896_at    | BEND4       | 1497     | 181    | 824       | 94     | 22           | 6      | 11            | 0      |
| 218332_at    | BEX1        | 4164     | 274    | 3931      | 216    | 5073         | 467    | 85            | 34     |
| 224367_at    | BEX2        | 1514     | 149    | 1393      | 143    | 748          | 100    | 58            | 21     |
| 1554020_at   | BICD1       | 791      | 108    | 633       | 93     | 216          | 22     | 40            | 29     |
| 205733_at    | BLM         | 512      | 28     | 495       | 28     | 93           | 11     | 45            | 13     |
| 231953_at    | BPTF        | 695      | 15     | 540       | 45     | 68           | 5      | 42            | 13     |
| 209642_at    | BUB1        | 1695     | 60     | 1413      | 64     | 264          | 70     | 95            | 83     |
| 203755_at    | BUB1B       | 2938     | 32     | 2576      | 127    | 390          | 66     | 215           | 179    |
| 228281_at    | C11orf82    | 721      | 52     | 762       | 23     | 135          | 21     | 86            | 53     |
| 218614_at    | C12orf35    | 2753     | 139    | 1609      | 139    | 1395         | 132    | 1001          | 533    |
| 227928_at    | C12orf48    | 285      | 23     | 307       | 31     | 55           | 9      | 40            | 29     |
| 1570153_at   | C13orf38    | 984      | 306    | 716       | 144    | 20           | 3      | 21            | 10     |
| 220536_at    | C14orf115   | 609      | 7      | 501       | 41     | 103          | 7      | 104           | 22     |
| 226456_at    | C16orf75    | 2096     | 64     | 1457      | 123    | 370          | 45     | 145           | 76     |
| 223631_s_at  | C19orf33    | 332      | 57     | 333       | 111    | 623          | 94     | 158           | 6      |
| 219010_at    | C1orf106    | 1645     | 59     | 1271      | 83     | 2317         | 188    | 390           | 154    |
| 220011_at    | C1orf135    | 773      | 45     | 693       | 30     | 161          | 11     | 76            | 14     |
| 1554340_a_at | C1orf187    | 409      | 15     | 376       | 70     | 28           | 8      | 14            | 0      |
| 219004_s_at  | C21orf45    | 1586     | 22     | 1361      | 53     | 262          | 32     | 181           | 64     |
| 232067_at    | C6orf168    | 315      | 30     | 424       | 50     | 241          | 70     | 21            | 9      |
| 230903_s_at  | C8orf42     | 1308     | 144    | 1328      | 137    | 451          | 46     | 414           | 114    |
| 243610_at    | C9orf135    | 2099     | 301    | 1926      | 363    | 54           | 14     | 12            | 2      |
| 209726_at    | CA11        | 787      | 87     | 519       | 93     | 120          | 19     | 21            | 2      |
| 219464_at    | CA14        | 642      | 19     | 469       | 60     | 113          | 17     | 48            | 7      |

|             |           |       |     |       |      |       |      |      |      |
|-------------|-----------|-------|-----|-------|------|-------|------|------|------|
| 225627_s_at | CACHD1    | 2449  | 113 | 1967  | 216  | 1664  | 267  | 109  | 20   |
| 204811_s_at | CACNA2D2  | 484   | 46  | 386   | 80   | 148   | 15   | 79   | 17   |
| 205625_s_at | CALB1     | 412   | 105 | 465   | 87   | 106   | 26   | 15   | 0    |
| 214636_at   | CALCB     | 136   | 74  | 211   | 142  | 26    | 8    | 18   | 4    |
| 226473_at   | CBX2      | 1346  | 36  | 959   | 100  | 459   | 88   | 73   | 10   |
| 239233_at   | CCDC88A   | 72    | 6   | 57    | 8    | 9     | 1    | 9    | 1    |
| 227228_s_at | CCDC88C   | 339   | 27  | 398   | 46   | 294   | 35   | 54   | 15   |
| 210381_s_at | CCKBR     | 198   | 28  | 318   | 104  | 461   | 209  | 34   | 1    |
| 228729_at   | CCNB1     | 2322  | 78  | 1721  | 119  | 356   | 41   | 177  | 156  |
| 202705_at   | CCNB2     | 2785  | 63  | 2362  | 84   | 458   | 55   | 226  | 195  |
| 209583_s_at | CD200     | 1809  | 39  | 1618  | 281  | 222   | 51   | 31   | 17   |
| 209771_x_at | CD24      | 17099 | 52  | 14710 | 602  | 15262 | 1043 | 9532 | 1357 |
| 204695_at   | CDC25A    | 1369  | 23  | 1255  | 91   | 253   | 15   | 101  | 12   |
| 203967_at   | CDC6      | 611   | 52  | 652   | 33   | 156   | 13   | 99   | 78   |
| 204510_at   | CDC7      | 1398  | 99  | 1268  | 93   | 291   | 27   | 127  | 76   |
| 224428_s_at | CDCA7     | 2738  | 36  | 2073  | 188  | 547   | 102  | 113  | 95   |
| 201131_s_at | CDH1      | 4756  | 206 | 3161  | 353  | 5044  | 640  | 2050 | 886  |
| 203256_at   | CDH3      | 1688  | 6   | 1409  | 135  | 1869  | 250  | 94   | 34   |
| 226185_at   | CDS1      | 368   | 26  | 282   | 29   | 608   | 74   | 64   | 17   |
| 228868_x_at | CDT1      | 615   | 1   | 496   | 38   | 168   | 24   | 47   | 25   |
| 219505_at   | CECR1     | 1049  | 148 | 866   | 125  | 544   | 47   | 90   | 2    |
| 223729_at   | CECR2     | 982   | 30  | 815   | 68   | 213   | 10   | 194  | 69   |
| 231772_x_at | CENPH     | 927   | 31  | 659   | 79   | 138   | 17   | 59   | 32   |
| 221378_at   | CER1      | 492   | 154 | 501   | 156  | 60    | 23   | 33   | 1    |
| 225817_at   | CGNL1     | 1538  | 74  | 1089  | 123  | 1192  | 44   | 1574 | 903  |
| 218829_s_at | CHD7      | 836   | 228 | 1447  | 138  | 1049  | 71   | 196  | 11   |
| 205394_at   | CHEK1     | 1163  | 37  | 849   | 90   | 148   | 19   | 95   | 75   |
| 226803_at   | CHMP4C    | 212   | 29  | 402   | 61   | 615   | 139  | 761  | 41   |
| 206533_at   | CHRNA5    | 175   | 20  | 157   | 8    | 19    | 2    | 16   | 4    |
| 224400_s_at | CHST9     | 163   | 37  | 149   | 42   | 384   | 67   | 242  | 76   |
| 202712_s_at | CKMT1A/B  | 926   | 60  | 553   | 90   | 51    | 5    | 52   | 4    |
| 205328_at   | CLDN10    | 715   | 32  | 845   | 144  | 47    | 5    | 94   | 0    |
| 237810_at   | CLDN6     | 1051  | 312 | 2111  | 534  | 1113  | 85   | 28   | 1    |
| 202790_at   | CLDN7     | 894   | 62  | 684   | 49   | 1444  | 208  | 507  | 192  |
| 219301_s_at | CNTNAP2   | 1404  | 132 | 1184  | 222  | 425   | 57   | 103  | 2    |
| 223796_at   | CNTNAP3   | 284   | 43  | 256   | 48   | 33    | 7    | 26   | 7    |
| 213050_at   | COBL      | 787   | 154 | 826   | 188  | 705   | 69   | 864  | 421  |
| 205229_s_at | COCH      | 838   | 53  | 1292  | 322  | 187   | 33   | 42   | 18   |
| 213492_at   | COL2A1    | 159   | 10  | 908   | 576  | 3865  | 944  | 43   | 6    |
| 213992_at   | COL4A6    | 333   | 36  | 486   | 44   | 3188  | 414  | 20   | 3    |
| 227177_at   | CORO2A    | 211   | 14  | 302   | 46   | 483   | 104  | 149  | 42   |
| 224344_at   | COX6A1    | 2567  | 865 | 1506  | 544  | 57    | 6    | 46   | 0    |
| 208146_s_at | CPVL      | 598   | 20  | 543   | 48   | 726   | 163  | 38   | 19   |
| 239205_s_at | CR1 /CR1L | 74    | 37  | 175   | 33   | 10    | 1    | 9    | 1    |
| 239206_at   | CR1L      | 62    | 32  | 108   | 14   | 15    | 1    | 14   | 0    |
| 205350_at   | CRABP1    | 947   | 59  | 4103  | 1430 | 405   | 332  | 62   | 1    |
| 223475_at   | CRISPLD1  | 713   | 22  | 1917  | 1067 | 572   | 45   | 6    | 0    |
| 206224_at   | CST1      | 131   | 23  | 524   | 393  | 1492  | 323  | 22   | 4    |
| 210074_at   | CTSL2     | 2509  | 180 | 1948  | 169  | 1804  | 197  | 132  | 20   |
| 203917_at   | CXADR     | 4296  | 116 | 4419  | 278  | 2238  | 36   | 1209 | 445  |

|             |          |       |     |       |      |      |      |      |      |
|-------------|----------|-------|-----|-------|------|------|------|------|------|
| 239155_at   | CXADRP1  | 663   | 22  | 533   | 54   | 315  | 35   | 285  | 10   |
| 214974_x_at | CXCL5    | 1544  | 424 | 2275  | 1030 | 36   | 8    | 456  | 337  |
| 206424_at   | CYP26A1  | 1367  | 155 | 1472  | 343  | 103  | 23   | 33   | 4    |
| 223385_at   | CYP2S1   | 291   | 25  | 778   | 229  | 94   | 15   | 42   | 5    |
| 235044_at   | CYYR1    | 392   | 37  | 479   | 42   | 511  | 109  | 11   | 0    |
| 206588_at   | DAZL     | 112   | 20  | 76    | 26   | 6    | 0    | 6    | 0    |
| 205399_at   | DCLK1    | 1595  | 157 | 1347  | 183  | 38   | 7    | 20   | 3    |
| 235258_at   | DCP2     | 504   | 74  | 359   | 44   | 240  | 26   | 62   | 10   |
| 219945_at   | DDX25    | 497   | 53  | 374   | 62   | 54   | 8    | 34   | 3    |
| 226980_at   | DEPDC1B  | 1227  | 48  | 898   | 93   | 192  | 35   | 53   | 21   |
| 205603_s_at | DIAPH2   | 2259  | 737 | 1789  | 142  | 151  | 9    | 236  | 37   |
| 203764_at   | DLGAP5   | 2130  | 39  | 1815  | 78   | 207  | 40   | 134  | 120  |
| 209560_s_at | DLK1     | 108   | 14  | 721   | 464  | 6810 | 625  | 14   | 0    |
| 226926_at   | DMKN     | 1084  | 21  | 1176  | 174  | 716  | 90   | 94   | 8    |
| 222640_at   | DNMT3A   | 1967  | 36  | 1824  | 60   | 950  | 46   | 214  | 6    |
| 220668_s_at | DNMT3B   | 12326 | 579 | 8911  | 479  | 660  | 118  | 134  | 16   |
| 240301_at   | DPPA2    | 359   | 54  | 150   | 18   | 46   | 7    | 26   | 3    |
| 231385_at   | DPPA3    | 240   | 14  | 43    | 13   | 304  | 61   | 10   | 0    |
| 232985_s_at | DPPA4    | 9192  | 358 | 7635  | 379  | 447  | 80   | 30   | 4    |
| 226817_at   | DSC2     | 1051  | 63  | 871   | 114  | 2545 | 162  | 401  | 22   |
| 219000_s_at | DSCC1    | 1227  | 71  | 1044  | 72   | 126  | 11   | 89   | 36   |
| 217901_at   | DSG2     | 4138  | 153 | 3471  | 256  | 5354 | 711  | 2051 | 300  |
| 218585_s_at | DTL      | 2142  | 109 | 2321  | 161  | 307  | 31   | 180  | 146  |
| 221586_s_at | E2F5     | 960   | 17  | 1003  | 86   | 332  | 58   | 117  | 60   |
| 204271_s_at | EDNRB    | 1710  | 132 | 3166  | 671  | 930  | 122  | 143  | 118  |
| 219232_s_at | EGLN3    | 384   | 21  | 381   | 51   | 113  | 7    | 172  | 111  |
| 227180_at   | ELOVL7   | 312   | 13  | 253   | 40   | 473  | 127  | 73   | 3    |
| 226789_at   | EMB      | 906   | 15  | 783   | 110  | 242  | 78   | 106  | 29   |
| 229080_at   | EMID2    | 240   | 31  | 306   | 43   | 427  | 73   | 52   | 0    |
| 220161_s_at | EPB41L4B | 1251  | 52  | 1234  | 144  | 349  | 16   | 2354 | 236  |
| 229292_at   | EPB41L5  | 461   | 52  | 362   | 40   | 429  | 55   | 614  | 283  |
| 201839_s_at | EPCAM    | 7357  | 195 | 5443  | 524  | 9719 | 1314 | 438  | 20   |
| 205977_s_at | EPHA1    | 421   | 34  | 427   | 35   | 392  | 72   | 180  | 77   |
| 229288_at   | EPHA7    | 124   | 7   | 519   | 130  | 690  | 106  | 18   | 4    |
| 220013_at   | EPHX3    | 527   | 33  | 430   | 88   | 166  | 27   | 50   | 3    |
| 232165_at   | EPPK1    | 478   | 12  | 473   | 95   | 970  | 216  | 96   | 7    |
| 226213_at   | ERBB3    | 1538  | 70  | 1024  | 143  | 1494 | 330  | 2774 | 1251 |
| 219650_at   | ERCC6L   | 531   | 54  | 466   | 25   | 68   | 8    | 71   | 32   |
| 225846_at   | ESRP1    | 3037  | 150 | 2478  | 340  | 2209 | 75   | 44   | 2    |
| 219395_at   | ESRP2    | 593   | 7   | 522   | 68   | 1168 | 88   | 964  | 335  |
| 223000_s_at | F11R     | 4770  | 216 | 4284  | 316  | 6440 | 408  | 3156 | 616  |
| 213506_at   | F2RL1    | 2044  | 161 | 2561  | 702  | 9854 | 2230 | 1272 | 465  |
| 219429_at   | FA2H     | 246   | 27  | 164   | 27   | 108  | 17   | 58   | 2    |
| 202345_s_at | FABP5    | 10904 | 434 | 10457 | 384  | 4683 | 1258 | 523  | 452  |
| 235177_at   | FAM119A  | 1700  | 74  | 1400  | 88   | 495  | 54   | 318  | 87   |
| 230067_at   | FAM124A  | 837   | 37  | 698   | 80   | 43   | 4    | 37   | 12   |
| 238018_at   | FAM150B  | 177   | 3   | 398   | 78   | 29   | 3    | 107  | 50   |
| 235048_at   | FAM169A  | 867   | 16  | 880   | 53   | 533  | 65   | 213  | 88   |
| 242348_at   | FAM19A4  | 55    | 6   | 50    | 5    | 246  | 172  | 8    | 0    |
| 229518_at   | FAM46B   | 2203  | 100 | 1518  | 62   | 770  | 72   | 77   | 34   |

|              |          |      |     |      |     |      |      |      |      |
|--------------|----------|------|-----|------|-----|------|------|------|------|
| 220147_s_at  | FAM60A   | 6725 | 54  | 6074 | 516 | 2210 | 247  | 384  | 179  |
| 225687_at    | FAM83D   | 1509 | 60  | 1425 | 82  | 144  | 23   | 161  | 116  |
| 235269_at    | FAM83F   | 175  | 20  | 212  | 30  | 477  | 74   | 48   | 11   |
| 226129_at    | FAM83H   | 453  | 16  | 519  | 55  | 944  | 56   | 469  | 9    |
| 225864_at    | FAM84B   | 997  | 70  | 984  | 88  | 1669 | 130  | 350  | 116  |
| 242560_at    | FANCD2   | 1740 | 72  | 1669 | 112 | 362  | 28   | 118  | 60   |
| 220615_s_at  | FAR2     | 513  | 31  | 491  | 73  | 307  | 74   | 15   | 1    |
| 218796_at    | FERMT1   | 806  | 72  | 660  | 97  | 186  | 19   | 213  | 126  |
| 205110_s_at  | FGF13    | 1380 | 148 | 2101 | 215 | 469  | 93   | 86   | 11   |
| 223761_at    | FGF19    | 154  | 13  | 222  | 85  | 62   | 7    | 38   | 11   |
| 203638_s_at  | FGFR2    | 1139 | 107 | 935  | 102 | 1324 | 60   | 583  | 469  |
| 1570515_a_at | FILIP1   | 85   | 13  | 76   | 20  | 20   | 3    | 7    | 1    |
| 1553991_s_at | FLJ20674 | 942  | 67  | 557  | 60  | 76   | 9    | 290  | 18   |
| 1564413_at   | FLJ36116 | 474  | 57  | 799  | 371 | 587  | 195  | 42   | 3    |
| 210287_s_at  | FLT1     | 82   | 23  | 59   | 14  | 15   | 2    | 11   | 1    |
| 222906_at    | FLVCR1   | 1358 | 175 | 1335 | 145 | 785  | 171  | 153  | 14   |
| 228463_at    | FOXA3    | 324  | 38  | 243  | 14  | 547  | 32   | 449  | 7    |
| 241612_at    | FOXD3    | 191  | 15  | 198  | 25  | 12   | 1    | 12   | 0    |
| 231407_s_at  | FOXH1    | 1138 | 36  | 753  | 89  | 182  | 24   | 39   | 1    |
| 202724_s_at  | FOXO1    | 1038 | 40  | 696  | 62  | 469  | 80   | 227  | 27   |
| 226145_s_at  | FRAS1    | 2024 | 194 | 1784 | 287 | 4479 | 322  | 88   | 44   |
| 209864_at    | FRAT2    | 1668 | 53  | 1258 | 102 | 471  | 59   | 260  | 46   |
| 230964_at    | FREM2    | 535  | 60  | 412  | 69  | 1943 | 162  | 30   | 20   |
| 203697_at    | FRZB     | 136  | 22  | 292  | 88  | 2791 | 224  | 15   | 1    |
| 221245_s_at  | FZD5     | 2433 | 28  | 2559 | 196 | 3828 | 735  | 1528 | 529  |
| 227830_at    | GABRB3   | 2725 | 101 | 2266 | 163 | 96   | 8    | 40   | 3    |
| 214240_at    | GAL      | 4289 | 628 | 4936 | 816 | 97   | 12   | 548  | 453  |
| 203397_s_at  | GALNT3   | 587  | 217 | 507  | 72  | 138  | 26   | 81   | 19   |
| 213280_at    | GARNL4   | 831  | 34  | 625  | 91  | 267  | 32   | 105  | 54   |
| 230788_at    | GCNT2    | 1903 | 45  | 1569 | 80  | 1475 | 65   | 558  | 1    |
| 220053_at    | GDF3     | 1112 | 149 | 1167 | 687 | 96   | 31   | 59   | 4    |
| 206102_at    | GINS1    | 3530 | 92  | 3173 | 173 | 538  | 52   | 284  | 193  |
| 221521_s_at  | GINS2    | 1515 | 82  | 1476 | 67  | 209  | 30   | 130  | 62   |
| 1569886_a_at | GLB1L3   | 194  | 9   | 105  | 30  | 6    | 0    | 6    | 0    |
| 204836_at    | GLDC     | 2983 | 325 | 2976 | 330 | 3566 | 650  | 1970 | 263  |
| 220108_at    | GNA14    | 475  | 100 | 1035 | 110 | 54   | 7    | 76   | 2    |
| 214071_at    | GNAL     | 289  | 51  | 235  | 55  | 31   | 4    | 18   | 2    |
| 209220_at    | GPC3     | 374  | 55  | 614  | 60  | 9377 | 1086 | 42   | 11   |
| 204984_at    | GPC4     | 3755 | 202 | 3711 | 593 | 383  | 68   | 49   | 17   |
| 206696_at    | GPR143   | 249  | 11  | 201  | 25  | 104  | 11   | 40   | 13   |
| 223423_at    | GPR160   | 960  | 67  | 714  | 45  | 515  | 136  | 49   | 1    |
| 207183_at    | GPR19    | 665  | 52  | 559  | 59  | 47   | 10   | 14   | 1    |
| 206002_at    | GPR64    | 412  | 11  | 305  | 31  | 42   | 7    | 115  | 4    |
| 203632_s_at  | GPRC5B   | 2138 | 45  | 1764 | 150 | 1766 | 498  | 870  | 239  |
| 206204_at    | GRB14    | 385  | 26  | 451  | 44  | 182  | 27   | 2154 | 1437 |
| 205862_at    | GREB1    | 144  | 15  | 187  | 41  | 295  | 54   | 76   | 57   |
| 219388_at    | GRHL2    | 199  | 34  | 166  | 34  | 164  | 28   | 27   | 4    |
| 229377_at    | GRTP1    | 668  | 166 | 391  | 57  | 352  | 45   | 985  | 564  |
| 1255_g_at    | GUCA1A   | 813  | 63  | 360  | 98  | 104  | 17   | 16   | 2    |
| 204237_at    | GULP1    | 4701 | 358 | 4840 | 151 | 3680 | 214  | 80   | 15   |

|              |             |       |     |       |     |      |     |      |      |
|--------------|-------------|-------|-----|-------|-----|------|-----|------|------|
| 223541_at    | HAS3        | 896   | 97  | 845   | 50  | 154  | 31  | 162  | 100  |
| 239781_at    | hCG_1815504 | 571   | 36  | 349   | 30  | 27   | 3   | 32   | 5    |
| 227350_at    | HELLS       | 2866  | 60  | 2053  | 247 | 406  | 69  | 129  | 72   |
| 219863_at    | HERC5       | 857   | 70  | 549   | 71  | 1554 | 738 | 88   | 2    |
| 231381_at    | HESRG       | 13573 | 473 | 11514 | 439 | 28   | 5   | 16   | 0    |
| 211267_at    | HESX1       | 560   | 60  | 398   | 78  | 46   | 3   | 46   | 12   |
| 219743_at    | HEY2        | 548   | 32  | 364   | 13  | 129  | 17  | 75   | 41   |
| 212964_at    | HIC2        | 990   | 40  | 817   | 91  | 1601 | 118 | 93   | 5    |
| 239975_at    | HLA-DPB2    | 1348  | 251 | 731   | 169 | 14   | 3   | 11   | 1    |
| 208025_s_at  | HMGA2       | 2761  | 223 | 3488  | 340 | 1927 | 396 | 176  | 160  |
| 225601_at    | HMGB3       | 2558  | 74  | 1972  | 123 | 628  | 36  | 434  | 114  |
| 207165_at    | HMMR        | 2677  | 132 | 2164  | 216 | 360  | 73  | 311  | 195  |
| 225792_at    | HOOK1       | 705   | 49  | 537   | 44  | 277  | 36  | 719  | 340  |
| 203914_x_at  | HPGD        | 191   | 37  | 416   | 103 | 2660 | 638 | 3283 | 402  |
| 219983_at    | HRASLS      | 368   | 29  | 296   | 27  | 231  | 37  | 15   | 7    |
| 1552767_a_at | HS6ST2      | 293   | 37  | 662   | 269 | 1341 | 129 | 33   | 16   |
| 204130_at    | HSD11B2     | 107   | 11  | 99    | 11  | 34   | 4   | 25   | 5    |
| 210029_at    | IDO1        | 2459  | 290 | 1164  | 370 | 49   | 3   | 40   | 7    |
| 230960_at    | IGDCC3      | 276   | 14  | 655   | 114 | 2426 | 530 | 23   | 6    |
| 227377_at    | IGF2BP1     | 750   | 43  | 1256  | 173 | 991  | 178 | 67   | 13   |
| 203819_s_at  | IGF2BP3     | 5474  | 256 | 4570  | 433 | 2236 | 195 | 140  | 100  |
| 216493_s_at  | IGF2BP3     | 983   | 24  | 543   | 93  | 102  | 9   | 37   | 2    |
| 227760_at    | IGFBPL1     | 464   | 27  | 602   | 106 | 164  | 40  | 23   | 1    |
| 227997_at    | IL17RD      | 1566  | 61  | 2333  | 412 | 435  | 68  | 143  | 108  |
| 203126_at    | IMPA2       | 1333  | 47  | 1221  | 128 | 760  | 89  | 270  | 64   |
| 213447_at    | IPW         | 3908  | 155 | 3757  | 293 | 720  | 133 | 316  | 9    |
| 203474_at    | IQGAP2      | 730   | 52  | 627   | 46  | 848  | 146 | 1669 | 849  |
| 227297_at    | ITGA9       | 98    | 20  | 194   | 33  | 344  | 36  | 67   | 53   |
| 221051_s_at  | ITGB1BP3    | 946   | 40  | 957   | 115 | 275  | 115 | 47   | 5    |
| 202747_s_at  | ITM2A       | 966   | 72  | 532   | 67  | 196  | 27  | 39   | 7    |
| 203298_s_at  | JARID2      | 4897  | 157 | 4373  | 191 | 1018 | 68  | 234  | 26   |
| 229139_at    | JPH1        | 549   | 26  | 644   | 40  | 254  | 20  | 24   | 2    |
| 229294_at    | JPH3        | 247   | 11  | 199   | 24  | 189  | 30  | 10   | 0    |
| 205206_at    | KAL1        | 2053  | 84  | 2543  | 348 | 410  | 123 | 46   | 24   |
| 239835_at    | KBTBD8      | 708   | 42  | 543   | 50  | 202  | 24  | 64   | 40   |
| 207103_at    | KCND2       | 181   | 11  | 153   | 30  | 14   | 1   | 16   | 3    |
| 1552897_a_at | KCNG3       | 407   | 14  | 217   | 46  | 27   | 8   | 11   | 1    |
| 219615_s_at  | KCNK5       | 271   | 27  | 231   | 20  | 85   | 15  | 184  | 79   |
| 220116_at    | KCNN2       | 739   | 25  | 631   | 60  | 362  | 43  | 85   | 48   |
| 58916_at     | KCTD14      | 399   | 13  | 362   | 30  | 126  | 17  | 446  | 206  |
| 203934_at    | KDR         | 927   | 242 | 677   | 146 | 557  | 90  | 38   | 15   |
| 231887_s_at  | KIAA1274    | 406   | 24  | 459   | 31  | 142  | 14  | 62   | 5    |
| 235301_at    | KIAA1324L   | 379   | 32  | 333   | 27  | 334  | 16  | 36   | 7    |
| 228565_at    | KIAA1804    | 688   | 50  | 745   | 115 | 203  | 43  | 234  | 86   |
| 232069_at    | KIF26A      | 370   | 20  | 307   | 14  | 217  | 46  | 72   | 21   |
| 242517_at    | KISS1R      | 310   | 25  | 166   | 32  | 419  | 160 | 45   | 12   |
| 213610_s_at  | KLHL23      | 1825  | 92  | 1431  | 101 | 439  | 44  | 220  | 76   |
| 220239_at    | KLHL7       | 1441  | 85  | 1510  | 63  | 230  | 17  | 113  | 52   |
| 206541_at    | KLKB1       | 320   | 31  | 401   | 52  | 54   | 5   | 2822 | 2468 |
| 244264_at    | KLRG2       | 238   | 26  | 342   | 98  | 74   | 8   | 35   | 1    |

|              |              |       |     |       |      |       |      |       |      |
|--------------|--------------|-------|-----|-------|------|-------|------|-------|------|
| 201596_x_at  | KRT18        | 4494  | 302 | 5600  | 770  | 12374 | 954  | 14490 | 4342 |
| 201650_at    | KRT19        | 1051  | 30  | 802   | 138  | 6793  | 511  | 1104  | 308  |
| 209008_x_at  | KRT8         | 1472  | 222 | 2030  | 438  | 7133  | 277  | 7813  | 2389 |
| 219955_at    | L1TD1        | 12955 | 366 | 11925 | 449  | 196   | 33   | 32    | 4    |
| 227048_at    | LAMA1        | 453   | 22  | 487   | 32   | 4531  | 1084 | 32    | 22   |
| 1554679_a_at | LAPTM4B      | 5291  | 351 | 3142  | 417  | 321   | 56   | 421   | 241  |
| 204891_s_at  | LCK          | 769   | 64  | 635   | 100  | 41    | 2    | 36    | 2    |
| 206309_at    | LECT1        | 813   | 16  | 901   | 124  | 27    | 2    | 25    | 3    |
| 206268_at    | LEFTY1       | 1272  | 91  | 4740  | 1577 | 34    | 6    | 53    | 24   |
| 206012_at    | LEFTY2       | 790   | 46  | 2988  | 1390 | 142   | 27   | 48    | 1    |
| 219823_at    | LIN28        | 14338 | 239 | 11441 | 925  | 5595  | 633  | 18    | 4    |
| 229349_at    | LIN28B       | 5194  | 135 | 4153  | 246  | 1749  | 119  | 10    | 1    |
| 227933_at    | LINGO1       | 1703  | 62  | 867   | 133  | 186   | 17   | 72    | 3    |
| 230195_at    | LOC100131138 | 1004  | 247 | 1340  | 379  | 163   | 17   | 13    | 3    |
| 226809_at    | LOC100216479 | 703   | 264 | 661   | 119  | 342   | 71   | 24    | 8    |
| 232181_at    | LOC153346    | 444   | 30  | 282   | 29   | 62    | 11   | 111   | 5    |
| 1561101_at   | LOC153469    | 419   | 40  | 371   | 75   | 28    | 2    | 24    | 3    |
| 228051_at    | LOC202451    | 498   | 30  | 402   | 70   | 87    | 14   | 46    | 8    |
| 1557369_a_at | LOC285401    | 354   | 37  | 204   | 47   | 24    | 1    | 25    | 1    |
| 1564359_a_at | LOC339260    | 502   | 22  | 223   | 51   | 184   | 30   | 10    | 2    |
| 236756_at    | LOC389857    | 325   | 17  | 295   | 14   | 58    | 2    | 44    | 3    |
| 232001_at    | LOC439949    | 489   | 55  | 479   | 60   | 47    | 3    | 37    | 7    |
| 229669_at    | LOC440416    | 945   | 58  | 561   | 129  | 566   | 68   | 75    | 55   |
| 1557765_at   | LOC643401    | 99    | 32  | 50    | 9    | 78    | 10   | 8     | 0    |
| 1568780_at   | LOC649305    | 583   | 15  | 462   | 59   | 515   | 185  | 55    | 16   |
| 239319_at    | LOC728342    | 147   | 22  | 158   | 40   | 45    | 8    | 25    | 2    |
| 242070_at    | LOC728485    | 313   | 65  | 319   | 48   | 59    | 8    | 28    | 0    |
| 229978_at    | LOC729993    | 864   | 69  | 887   | 211  | 288   | 79   | 33    | 0    |
| 232111_at    | LOC730125    | 936   | 179 | 1042  | 88   | 64    | 12   | 32    | 1    |
| 228859_at    | LOC91431     | 344   | 39  | 310   | 31   | 76    | 8    | 39    | 1    |
| 220317_at    | LRAT         | 305   | 6   | 83    | 31   | 12    | 1    | 12    | 1    |
| 226884_at    | LRRN1        | 3515  | 118 | 2651  | 201  | 1718  | 191  | 15    | 1    |
| 208190_s_at  | LSR          | 637   | 44  | 924   | 155  | 2106  | 113  | 1442  | 284  |
| 223413_s_at  | LYAR         | 1925  | 44  | 1480  | 172  | 261   | 24   | 255   | 135  |
| 232151_at    | MACC1        | 216   | 22  | 181   | 36   | 85    | 24   | 26    | 3    |
| 203362_s_at  | MAD2L1       | 3445  | 109 | 3179  | 175  | 538   | 67   | 314   | 262  |
| 224650_at    | MAL2         | 2195  | 117 | 1763  | 156  | 1502  | 126  | 1055  | 254  |
| 213927_at    | MAP3K9       | 334   | 8   | 283   | 30   | 506   | 40   | 148   | 16   |
| 202890_at    | MAP7         | 2125  | 43  | 1281  | 188  | 869   | 109  | 664   | 172  |
| 235141_at    | MARVELD2     | 1453  | 79  | 1398  | 218  | 3387  | 453  | 2879  | 1095 |
| 239350_at    | MARVELD3     | 446   | 5   | 277   | 51   | 323   | 16   | 137   | 42   |
| 242260_at    | MATR3        | 662   | 57  | 371   | 63   | 77    | 7    | 59    | 23   |
| 214397_at    | MBD2         | 825   | 25  | 658   | 52   | 427   | 43   | 11    | 1    |
| 220651_s_at  | MCM10        | 1126  | 43  | 1058  | 41   | 90    | 16   | 81    | 57   |
| 201555_at    | MCM3         | 3310  | 117 | 3009  | 68   | 635   | 57   | 438   | 112  |
| 222037_at    | MCM4         | 727   | 24  | 793   | 41   | 130   | 14   | 97    | 41   |
| 216237_s_at  | MCM5         | 1970  | 57  | 1935  | 97   | 339   | 42   | 201   | 81   |
| 229797_at    | MCOLN3       | 309   | 37  | 230   | 50   | 414   | 105  | 16    | 1    |
| 212693_at    | MDN1         | 2023  | 43  | 2019  | 232  | 418   | 46   | 494   | 87   |
| 232523_at    | MEGF10       | 1546  | 135 | 870   | 183  | 106   | 46   | 22    | 11   |

|             |            |      |     |      |     |      |     |     |     |
|-------------|------------|------|-----|------|-----|------|-----|-----|-----|
| 228658_at   | MIAT       | 899  | 47  | 386  | 109 | 54   | 19  | 15  | 2   |
| 232291_at   | MIRHG1     | 1082 | 43  | 680  | 155 | 172  | 49  | 81  | 6   |
| 218883_s_at | MLF1P      | 3956 | 235 | 3451 | 234 | 470  | 51  | 145 | 77  |
| 223700_at   | MND1       | 586  | 47  | 500  | 32  | 60   | 10  | 29  | 15  |
| 238778_at   | MPP7       | 131  | 13  | 111  | 16  | 98   | 17  | 52  | 13  |
| 213924_at   | MPPE1      | 480  | 42  | 580  | 92  | 197  | 27  | 72  | 0   |
| 218536_at   | MRS2       | 1760 | 221 | 1674 | 169 | 1051 | 227 | 338 | 8   |
| 209421_at   | MSH2       | 2327 | 94  | 2172 | 133 | 348  | 53  | 197 | 59  |
| 223311_s_at | MTA3       | 1945 | 92  | 1371 | 129 | 521  | 39  | 240 | 4   |
| 203345_s_at | MTF2       | 2838 | 76  | 2335 | 219 | 688  | 39  | 306 | 15  |
| 209757_s_at | MYCN       | 3159 | 139 | 2783 | 357 | 868  | 217 | 17  | 1   |
| 229464_at   | MYEF2      | 699  | 26  | 665  | 70  | 161  | 18  | 22  | 6   |
| 218966_at   | MYO5C      | 728  | 16  | 1026 | 199 | 687  | 135 | 540 | 159 |
| 228242_at   | N4BP2      | 1458 | 17  | 1074 | 117 | 943  | 59  | 189 | 14  |
| 222161_at   | NAALAD2    | 175  | 61  | 104  | 16  | 910  | 114 | 10  | 3   |
| 220184_at   | NANOG      | 5685 | 278 | 6042 | 463 | 55   | 10  | 44  | 20  |
| 219368_at   | NAP1L2     | 914  | 55  | 649  | 75  | 45   | 9   | 73  | 12  |
| 204749_at   | NAP1L3     | 2189 | 381 | 2242 | 221 | 213  | 69  | 89  | 82  |
| 201970_s_at | NASP       | 6774 | 74  | 5543 | 336 | 1667 | 234 | 834 | 81  |
| 238697_at   | NCRNA00086 | 298  | 51  | 193  | 37  | 613  | 89  | 22  | 8   |
| 203961_at   | NEBL       | 262  | 38  | 327  | 36  | 245  | 16  | 150 | 8   |
| 203413_at   | NELL2      | 1279 | 37  | 1309 | 82  | 111  | 26  | 44  | 3   |
| 204702_s_at | NFE2L3     | 526  | 20  | 597  | 78  | 267  | 79  | 23  | 13  |
| 215228_at   | NHLH2      | 108  | 24  | 145  | 32  | 33   | 5   | 16  | 1   |
| 221933_at   | NLGN4X     | 3114 | 161 | 3385 | 379 | 354  | 127 | 25  | 7   |
| 221690_s_at | NLRP2      | 1464 | 726 | 1088 | 446 | 1057 | 367 | 22  | 1   |
| 206023_at   | NMU        | 2029 | 114 | 1623 | 197 | 55   | 14  | 26  | 4   |
| 230916_at   | NODAL      | 900  | 39  | 997  | 163 | 309  | 108 | 68  | 1   |
| 206801_at   | NPPB       | 632  | 204 | 548  | 177 | 1899 | 703 | 57  | 9   |
| 205440_s_at | NPY1R      | 143  | 31  | 71   | 18  | 64   | 16  | 9   | 3   |
| 228894_at   | NR6A1      | 1154 | 57  | 1084 | 89  | 778  | 168 | 76  | 11  |
| 227494_at   | NR6A1      | 727  | 58  | 915  | 121 | 772  | 162 | 109 | 7   |
| 206291_at   | NTS        | 2103 | 646 | 3794 | 903 | 746  | 224 | 15  | 6   |
| 213947_s_at | NUP210     | 547  | 26  | 547  | 54  | 293  | 39  | 202 | 87  |
| 220520_s_at | NUP62CL    | 84   | 16  | 86   | 7   | 29   | 3   | 32  | 4   |
| 209925_at   | OCLN       | 198  | 28  | 184  | 31  | 624  | 148 | 578 | 430 |
| 213599_at   | OIP5       | 2013 | 55  | 1393 | 114 | 176  | 21  | 110 | 72  |
| 205085_at   | ORC1L      | 514  | 21  | 378  | 42  | 57   | 5   | 33  | 10  |
| 219073_s_at | OSBPL10    | 907  | 20  | 995  | 164 | 855  | 106 | 87  | 73  |
| 242128_at   | OTX2       | 2717 | 173 | 1782 | 294 | 551  | 161 | 9   | 1   |
| 211778_s_at | OVOL2      | 168  | 16  | 141  | 20  | 213  | 56  | 30  | 5   |
| 228245_s_at | OVOS/OVOS2 | 622  | 97  | 513  | 100 | 130  | 43  | 32  | 10  |
| 221868_at   | PAIP2B     | 373  | 25  | 306  | 39  | 92   | 10  | 139 | 47  |
| 214834_at   | PAR5       | 90   | 18  | 44   | 8   | 7    | 0   | 7   | 0   |
| 235165_at   | PARD6B     | 566  | 33  | 420  | 61  | 1205 | 169 | 352 | 219 |
| 223435_s_at | PCDHA1     | 756  | 21  | 943  | 128 | 834  | 129 | 48  | 2   |
| 231725_at   | PCDHB2     | 570  | 95  | 584  | 46  | 588  | 91  | 23  | 8   |
| 223629_at   | PCDHB5     | 657  | 146 | 702  | 219 | 488  | 94  | 66  | 5   |
| 232553_at   | PCYT1B     | 226  | 53  | 237  | 17  | 152  | 20  | 20  | 2   |
| 223358_s_at | PDE7A      | 1158 | 51  | 1002 | 56  | 473  | 30  | 65  | 36  |

|             |               |       |     |      |     |      |      |      |     |
|-------------|---------------|-------|-----|------|-----|------|------|------|-----|
| 221898_at   | PDPN          | 727   | 29  | 729  | 63  | 600  | 95   | 40   | 15  |
| 209493_at   | PDZD2         | 216   | 37  | 192  | 22  | 57   | 9    | 16   | 4   |
| 213302_at   | PFAS          | 2475  | 27  | 1977 | 98  | 465  | 69   | 364  | 152 |
| 225958_at   | PHC1          | 4691  | 285 | 3371 | 261 | 369  | 44   | 152  | 21  |
| 218338_at   | PHC1/PHC1B    | 4380  | 342 | 3203 | 403 | 527  | 20   | 242  | 31  |
| 235024_at   | PHF17         | 1040  | 113 | 637  | 78  | 448  | 102  | 90   | 25  |
| 204269_at   | PIM2          | 1267  | 154 | 891  | 41  | 126  | 4    | 104  | 2   |
| 205632_s_at | PIP5K1B       | 239   | 28  | 222  | 57  | 370  | 63   | 18   | 5   |
| 223551_at   | PKIB          | 1231  | 141 | 1280 | 120 | 1103 | 128  | 935  | 221 |
| 207717_s_at | PKP2          | 274   | 9   | 361  | 43  | 1187 | 231  | 646  | 83  |
| 209581_at   | PLA2G16       | 2962  | 195 | 2611 | 218 | 1425 | 441  | 1172 | 19  |
| 218454_at   | PLBD1         | 563   | 34  | 490  | 50  | 409  | 93   | 194  | 40  |
| 214745_at   | PLCH1         | 453   | 30  | 375  | 58  | 91   | 10   | 51   | 7   |
| 230441_at   | PLEKHG4B      | 331   | 12  | 310  | 21  | 227  | 64   | 32   | 2   |
| 225726_s_at | PLEKHH1       | 653   | 20  | 520  | 71  | 1592 | 172  | 265  | 63  |
| 210198_s_at | PLP1          | 1570  | 383 | 911  | 206 | 72   | 30   | 9    | 0   |
| 205190_at   | PLS1          | 530   | 32  | 591  | 53  | 303  | 51   | 1358 | 140 |
| 204285_s_at | PMAIP1        | 4612  | 181 | 3351 | 303 | 471  | 185  | 325  | 309 |
| 201578_at   | PODXL         | 9923  | 543 | 8961 | 415 | 5476 | 453  | 157  | 101 |
| 205909_at   | POLE2         | 849   | 15  | 791  | 61  | 99   | 13   | 164  | 28  |
| 206653_at   | POLR3G        | 2022  | 97  | 2036 | 171 | 52   | 12   | 115  | 65  |
| 208286_x_at | POU5F1 (OCT4) | 11303 | 544 | 8105 | 983 | 170  | 15   | 217  | 56  |
| 214532_x_at | POU5F1B       | 7223  | 102 | 6228 | 540 | 173  | 11   | 197  | 38  |
| 210265_x_at | POU5F1P3      | 4766  | 233 | 3359 | 362 | 46   | 4    | 56   | 10  |
| 210905_x_at | POU5F1P4      | 4009  | 162 | 2723 | 348 | 58   | 5    | 76   | 20  |
| 209529_at   | PPAP2C        | 689   | 39  | 370  | 75  | 130  | 13   | 51   | 8   |
| 209433_s_at | PPAT          | 1328  | 13  | 1305 | 121 | 315  | 62   | 123  | 9   |
| 212686_at   | PPM1H         | 638   | 19  | 395  | 80  | 501  | 70   | 99   | 18  |
| 228494_at   | PPP1R9A       | 427   | 21  | 379  | 38  | 324  | 46   | 18   | 2   |
| 213849_s_at | PPP2R2B       | 1308  | 46  | 750  | 140 | 110  | 45   | 17   | 0   |
| 228010_at   | PPP2R2C       | 187   | 22  | 204  | 35  | 27   | 2    | 22   | 4   |
| 233002_at   | PPP4R4        | 106   | 16  | 158  | 26  | 21   | 3    | 45   | 12  |
| 220714_at   | PRDM14        | 2002  | 213 | 996  | 223 | 72   | 4    | 65   | 10  |
| 230708_at   | PRICKLE1      | 666   | 77  | 855  | 142 | 476  | 47   | 46   | 19  |
| 205053_at   | PRIM1         | 1555  | 56  | 1329 | 82  | 163  | 26   | 151  | 2   |
| 210038_at   | PRKCQ         | 517   | 72  | 411  | 61  | 87   | 7    | 46   | 1   |
| 204304_s_at | PROM1         | 2197  | 312 | 2047 | 298 | 5964 | 1308 | 137  | 69  |
| 208165_s_at | PRSS16        | 188   | 13  | 140  | 22  | 332  | 32   | 22   | 6   |
| 202525_at   | PRSS8         | 390   | 41  | 415  | 68  | 2322 | 83   | 158  | 16  |
| 229073_at   | PRTG          | 142   | 52  | 1078 | 565 | 3094 | 339  | 17   | 0   |
| 210758_at   | PSIP1         | 1961  | 103 | 1526 | 101 | 199  | 15   | 131  | 32  |
| 204469_at   | PTPRZ1        | 2467  | 192 | 2104 | 178 | 67   | 33   | 6    | 1   |
| 218186_at   | RAB25         | 435   | 58  | 371  | 51  | 1237 | 208  | 64   | 10  |
| 203020_at   | RABGAP1L      | 2024  | 70  | 1625 | 199 | 374  | 44   | 331  | 38  |
| 204146_at   | RAD51AP1      | 2230  | 93  | 2089 | 249 | 269  | 44   | 160  | 110 |
| 220549_at   | RAD54B        | 182   | 31  | 127  | 25  | 50   | 7    | 22   | 2   |
| 230563_at   | RASGEF1A      | 655   | 71  | 467  | 50  | 289  | 46   | 16   | 3   |
| 219142_at   | RASL11B       | 1341  | 163 | 979  | 98  | 491  | 86   | 84   | 9   |
| 218035_s_at | RBM47         | 1804  | 29  | 1995 | 176 | 2280 | 352  | 2304 | 549 |
| 228802_at   | RBPM52        | 5114  | 41  | 5443 | 415 | 2065 | 225  | 464  | 139 |



|              |               |      |     |      |      |       |      |      |      |
|--------------|---------------|------|-----|------|------|-------|------|------|------|
| 224578_at    | RCC2          | 5617 | 91  | 5182 | 289  | 1941  | 128  | 534  | 214  |
| 204127_at    | RFC3          | 2165 | 85  | 1987 | 162  | 274   | 43   | 245  | 133  |
| 209071_s_at  | RGS5          | 487  | 41  | 1546 | 364  | 841   | 108  | 81   | 14   |
| 214519_s_at  | RLN2          | 86   | 35  | 107  | 12   | 18    | 3    | 14   | 1    |
| 229782_at    | RMST          | 1120 | 76  | 678  | 155  | 65    | 18   | 11   | 1    |
| 213467_at    | RND2          | 576  | 5   | 597  | 38   | 145   | 9    | 55   | 0    |
| 235199_at    | RNF125        | 886  | 125 | 448  | 92   | 47    | 5    | 391  | 171  |
| 239143_x_at  | RNF138        | 515  | 37  | 349  | 52   | 51    | 6    | 51   | 10   |
| 232060_at    | ROR1          | 2157 | 273 | 1905 | 226  | 738   | 119  | 409  | 394  |
| 226482_s_at  | RP11-544M22.4 | 1482 | 104 | 1029 | 187  | 589   | 51   | 965  | 179  |
| 218499_at    | RP6-213H19.1  | 2967 | 127 | 3211 | 392  | 1778  | 190  | 395  | 29   |
| 219370_at    | RPRM          | 794  | 10  | 1460 | 321  | 148   | 16   | 88   | 28   |
| 1555878_at   | RPS24         | 1368 | 76  | 964  | 119  | 341   | 19   | 636  | 107  |
| 213283_s_at  | SALL2         | 4028 | 126 | 3267 | 207  | 832   | 120  | 114  | 3    |
| 243672_at    | SALL3         | 1112 | 28  | 600  | 62   | 38    | 6    | 15   | 3    |
| 229661_at    | SALL4         | 2998 | 135 | 3426 | 625  | 750   | 91   | 82   | 3    |
| 226548_at    | SBK1          | 946  | 4   | 676  | 69   | 456   | 60   | 39   | 2    |
| 219196_at    | SCG3          | 726  | 60  | 382  | 94   | 17    | 3    | 7    | 0    |
| 228782_at    | SCGB3A2       | 504  | 47  | 352  | 41   | 36    | 3    | 24   | 1    |
| 203453_at    | SCNN1A        | 1670 | 15  | 1241 | 118  | 876   | 245  | 123  | 23   |
| 203528_at    | SEMA4D        | 318  | 9   | 255  | 24   | 180   | 10   | 27   | 1    |
| 223449_at    | SEMA6A        | 2117 | 38  | 2983 | 572  | 1232  | 203  | 71   | 3    |
| 206442_at    | SEMG1         | 85   | 3   | 111  | 17   | 10    | 1    | 10   | 0    |
| 208939_at    | SEPHS1        | 5652 | 118 | 4429 | 150  | 415   | 72   | 335  | 96   |
| 209723_at    | SERPINB9      | 3701 | 314 | 3945 | 485  | 2698  | 509  | 222  | 165  |
| 223122_s_at  | SFRP2         | 2022 | 157 | 2859 | 588  | 305   | 112  | 18   | 3    |
| 205637_s_at  | SH3GL3        | 656  | 35  | 846  | 133  | 324   | 35   | 54   | 1    |
| 230493_at    | SHISA2        | 437  | 30  | 428  | 75   | 96    | 44   | 7    | 0    |
| 209848_s_at  | SILV          | 466  | 21  | 376  | 32   | 252   | 18   | 107  | 43   |
| 210567_s_at  | SKP2          | 413  | 33  | 360  | 36   | 91    | 9    | 37   | 8    |
| 202234_s_at  | SLC16A1       | 2415 | 157 | 2000 | 110  | 1189  | 69   | 354  | 87   |
| 222939_s_at  | SLC16A10      | 457  | 16  | 565  | 107  | 393   | 96   | 116  | 32   |
| 227506_at    | SLC16A9       | 1684 | 289 | 1354 | 191  | 142   | 35   | 41   | 7    |
| 1554593_s_at | SLC1A6        | 290  | 111 | 296  | 50   | 26    | 8    | 8    | 0    |
| 203775_at    | SLC25A13      | 1549 | 49  | 1574 | 84   | 1084  | 61   | 847  | 269  |
| 220474_at    | SLC25A21      | 88   | 18  | 99   | 16   | 10    | 1    | 17   | 3    |
| 222088_s_at  | SLC2A14       | 3002 | 143 | 3885 | 699  | 7479  | 899  | 101  | 37   |
| 202499_s_at  | SLC2A3        | 4738 | 353 | 5842 | 1062 | 14179 | 1069 | 119  | 103  |
| 209267_s_at  | SLC39A8       | 1077 | 95  | 1192 | 186  | 383   | 55   | 730  | 249  |
| 223748_at    | SLC4A11       | 709  | 63  | 406  | 66   | 174   | 13   | 149  | 45   |
| 232263_at    | SLC6A15       | 217  | 32  | 275  | 35   | 30    | 2    | 12   | 2    |
| 230597_at    | SLC7A3        | 2146 | 21  | 1961 | 349  | 215   | 45   | 15   | 3    |
| 222071_s_at  | SLCO4C1       | 250  | 28  | 165  | 33   | 242   | 98   | 195  | 117  |
| 1558217_at   | SLFN13        | 36   | 8   | 124  | 22   | 30    | 2    | 19   | 5    |
| 205309_at    | SMPDL3B       | 501  | 60  | 278  | 46   | 89    | 15   | 42   | 2    |
| 228370_at    | SNRPN         | 4746 | 95  | 3650 | 385  | 566   | 84   | 228  | 8    |
| 206042_x_at  | SNRPN/SNURF   | 6568 | 266 | 5196 | 531  | 515   | 79   | 850  | 2    |
| 220129_at    | SOHLH2        | 373  | 79  | 293  | 77   | 72    | 8    | 14   | 1    |
| 212560_at    | SORL1         | 1405 | 95  | 1206 | 72   | 499   | 144  | 1300 | 1065 |
| 228038_at    | SOX2          | 7792 | 240 | 6287 | 384  | 452   | 289  | 17   | 7    |

|             |             |       |     |       |     |      |     |      |     |
|-------------|-------------|-------|-----|-------|-----|------|-----|------|-----|
| 209891_at   | SPC25       | 562   | 24  | 469   | 43  | 33   | 5   | 42   | 34  |
| 205185_at   | SPINK5      | 186   | 23  | 180   | 42  | 211  | 33  | 27   | 5   |
| 202826_at   | SPINT1      | 417   | 28  | 551   | 107 | 2228 | 171 | 259  | 55  |
| 210715_s_at | SPINT2      | 2076  | 66  | 1621  | 147 | 4158 | 446 | 228  | 30  |
| 201998_at   | ST6GAL1     | 1058  | 52  | 1173  | 138 | 1117 | 171 | 4933 | 463 |
| 228821_at   | ST6GAL2     | 223   | 32  | 252   | 68  | 82   | 65  | 44   | 35  |
| 235334_at   | ST6GALNAC3  | 263   | 20  | 310   | 28  | 715  | 85  | 12   | 4   |
| 227461_at   | STON2       | 508   | 63  | 690   | 81  | 324  | 40  | 37   | 2   |
| 231969_at   | STOX2       | 460   | 16  | 802   | 62  | 164  | 19  | 124  | 58  |
| 233252_s_at | STRBP       | 1496  | 129 | 1158  | 127 | 436  | 79  | 286  | 6   |
| 205691_at   | SYNGR3      | 842   | 41  | 844   | 43  | 326  | 69  | 52   | 5   |
| 244227_at   | SYT6        | 341   | 75  | 377   | 73  | 85   | 11  | 33   | 11  |
| 206552_s_at | TAC1        | 158   | 17  | 148   | 18  | 57   | 14  | 6    | 0   |
| 235020_at   | TAF4B       | 870   | 34  | 1124  | 68  | 89   | 12  | 54   | 25  |
| 234970_at   | TC2N        | 103   | 4   | 66    | 8   | 53   | 9   | 16   | 6   |
| 206286_s_at | TDGF1/TDGF3 | 14828 | 287 | 13589 | 661 | 1863 | 486 | 46   | 5   |
| 223530_at   | TDRKH       | 246   | 10  | 261   | 35  | 69   | 10  | 57   | 4   |
| 41037_at    | TEAD4       | 690   | 16  | 672   | 61  | 266  | 22  | 97   | 71  |
| 203449_s_at | TERF1       | 9136  | 334 | 6222  | 758 | 439  | 42  | 360  | 15  |
| 228906_at   | TET1        | 2962  | 119 | 2278  | 220 | 1477 | 498 | 47   | 16  |
| 221035_s_at | TEX14       | 66    | 9   | 169   | 60  | 21   | 4   | 26   | 3   |
| 232760_at   | TEX15       | 232   | 25  | 208   | 38  | 12   | 1   | 10   | 1   |
| 203176_s_at | TFAM        | 1552  | 58  | 1265  | 160 | 311  | 40  | 238  | 44  |
| 230185_at   | THAP9       | 513   | 35  | 398   | 30  | 114  | 13  | 65   | 6   |
| 205122_at   | TMEFF1      | 2143  | 104 | 1749  | 167 | 1266 | 79  | 57   | 38  |
| 225822_at   | TMEM125     | 352   | 10  | 274   | 24  | 544  | 59  | 64   | 8   |
| 213285_at   | TMEM30B     | 333   | 36  | 223   | 42  | 491  | 78  | 216  | 115 |
| 238846_at   | TNFRSF11A   | 172   | 3   | 107   | 26  | 22   | 6   | 15   | 3   |
| 210643_at   | TNFSF11     | 300   | 54  | 130   | 28  | 39   | 6   | 262  | 211 |
| 220065_at   | TNMD        | 87    | 10  | 82    | 17  | 18   | 4   | 16   | 1   |
| 205742_at   | TNNI3       | 212   | 42  | 163   | 19  | 50   | 7   | 27   | 5   |
| 213201_s_at | TNNT1       | 795   | 50  | 631   | 96  | 740  | 160 | 40   | 1   |
| 201690_s_at | TPD52       | 1748  | 8   | 1601  | 184 | 1723 | 173 | 1336 | 232 |
| 206117_at   | TPM1        | 1529  | 211 | 1687  | 137 | 703  | 140 | 188  | 8   |
| 211796_s_at | TRBC1/2     | 263   | 27  | 360   | 56  | 40   | 5   | 85   | 29  |
| 213301_x_at | TRIM24      | 2909  | 105 | 2090  | 173 | 1541 | 68  | 583  | 149 |
| 219736_at   | TRIM36      | 307   | 25  | 273   | 53  | 48   | 6   | 30   | 11  |
| 223599_at   | TRIM6       | 863   | 56  | 635   | 100 | 779  | 95  | 259  | 61  |
| 213172_at   | TTC9        | 238   | 26  | 220   | 31  | 43   | 3   | 31   | 3   |
| 204822_at   | TTK         | 1809  | 45  | 1476  | 109 | 263  | 39  | 106  | 84  |
| 214023_x_at | TUBB2B      | 5101  | 357 | 4535  | 475 | 2294 | 125 | 55   | 12  |
| 202954_at   | UBE2C       | 4190  | 26  | 3746  | 302 | 771  | 79  | 446  | 345 |
| 228956_at   | UGT8        | 631   | 23  | 406   | 58  | 259  | 53  | 7    | 0   |
| 231325_at   | UNC5D       | 708   | 39  | 401   | 61  | 83   | 18  | 22   | 2   |
| 224048_at   | USP44       | 3052  | 84  | 2435  | 181 | 21   | 3   | 14   | 1   |
| 202546_at   | VAMP8       | 1058  | 43  | 1000  | 276 | 1188 | 230 | 2988 | 604 |
| 226029_at   | VANGL2      | 791   | 59  | 1022  | 103 | 762  | 107 | 20   | 3   |
| 219740_at   | VASH2       | 2068  | 294 | 1209  | 169 | 35   | 6   | 22   | 3   |
| 203797_at   | VSNL1       | 756   | 125 | 1143  | 285 | 152  | 57  | 496  | 198 |
| 239552_at   | VWDE        | 400   | 122 | 87    | 45  | 24   | 9   | 12   | 3   |

|              |         |       |     |       |      |      |     |      |      |
|--------------|---------|-------|-----|-------|------|------|-----|------|------|
| 204728_s_at  | WDHD1   | 737   | 37  | 579   | 47   | 120  | 12  | 48   | 25   |
| 1556429_a_at | WDR67   | 324   | 7   | 226   | 27   | 23   | 4   | 22   | 5    |
| 204712_at    | WIF1    | 305   | 53  | 220   | 27   | 243  | 62  | 16   | 1    |
| 229849_at    | WIPF3   | 752   | 54  | 614   | 83   | 543  | 123 | 183  | 49   |
| 232282_at    | WNK3    | 310   | 9   | 326   | 55   | 164  | 21  | 112  | 57   |
| 206698_at    | XK      | 82    | 5   | 88    | 12   | 62   | 14  | 38   | 20   |
| 243161_x_at  | ZFP42   | 3124  | 437 | 1417  | 472  | 376  | 101 | 12   | 3    |
| 233064_at    | ZFR2    | 752   | 105 | 787   | 84   | 154  | 19  | 49   | 2    |
| 223642_at    | ZIC2    | 3164  | 152 | 3434  | 405  | 384  | 119 | 12   | 2    |
| 207197_at    | ZIC3    | 1762  | 16  | 1686  | 147  | 49   | 14  | 29   | 3    |
| 205739_x_at  | ZNF107  | 781   | 148 | 733   | 72   | 234  | 44  | 104  | 4    |
| 1552947_x_at | ZNF114  | 325   | 8   | 257   | 32   | 174  | 58  | 15   | 1    |
| 206683_at    | ZNF165  | 248   | 29  | 178   | 19   | 325  | 96  | 25   | 2    |
| 214823_at    | ZNF204  | 415   | 25  | 397   | 76   | 267  | 12  | 15   | 2    |
| 242919_at    | ZNF253  | 614   | 25  | 416   | 39   | 136  | 9   | 60   | 10   |
| 230789_at    | ZNF280B | 456   | 91  | 437   | 62   | 254  | 16  | 25   | 13   |
| 214761_at    | ZNF423  | 1494  | 140 | 2038  | 269  | 672  | 189 | 66   | 26   |
| 1568873_at   | ZNF519  | 367   | 30  | 290   | 29   | 50   | 7   | 30   | 7    |
| 219968_at    | ZNF589  | 1162  | 36  | 970   | 96   | 184  | 15  | 131  | 1    |
| 207219_at    | ZNF643  | 217   | 21  | 175   | 21   | 29   | 3   | 27   | 13   |
| 223616_at    | ZNF649  | 524   | 112 | 499   | 54   | 61   | 12  | 33   | 6    |
| 242923_at    | ZNF678  | 646   | 48  | 494   | 43   | 185  | 16  | 77   | 9    |
| 239482_x_at  | ZNF708  | 385   | 26  | 316   | 32   | 123  | 16  | 43   | 6    |
| 229700_at    | ZNF738  | 3398  | 192 | 2171  | 277  | 757  | 55  | 89   | 68   |
| 244552_at    | ZNF788  | 523   | 34  | 397   | 45   | 60   | 6   | 36   | 15   |
| 241912_at    | ZNF814  | 509   | 8   | 319   | 57   | 101  | 14  | 39   | 2    |
| 1569191_at   | ZNF826  | 131   | 114 | 593   | 85   | 149  | 49  | 18   | 10   |
| 244640_at    | ZNF850P | 710   | 92  | 561   | 87   | 134  | 12  | 35   | 9    |
| 208119_s_at  | ZNF93   | 1468  | 89  | 1193  | 87   | 500  | 43  | 97   | 33   |
| 1553875_s_at | ZSCAN10 | 558   | 89  | 624   | 92   | 53   | 4   | 59   | 2    |
| 231061_at    |         | 15325 | 617 | 13151 | 1369 | 465  | 69  | 132  | 0    |
| 231310_at    |         | 8281  | 300 | 6819  | 395  | 3450 | 207 | 23   | 10   |
| 1559280_a_at |         | 4917  | 736 | 3763  | 421  | 2126 | 588 | 11   | 2    |
| 1554007_at   |         | 4634  | 130 | 3580  | 277  | 192  | 26  | 43   | 1    |
| 239752_at    |         | 3859  | 114 | 2879  | 224  | 908  | 86  | 573  | 423  |
| 226374_at    |         | 3328  | 32  | 2695  | 198  | 1693 | 84  | 1004 | 234  |
| 216405_at    |         | 3018  | 976 | 2086  | 723  | 54   | 4   | 35   | 5    |
| 237911_at    |         | 2969  | 868 | 992   | 116  | 13   | 1   | 10   | 0    |
| 228191_at    |         | 2581  | 272 | 2616  | 134  | 1731 | 309 | 399  | 11   |
| 1570266_x_at |         | 2259  | 158 | 2466  | 247  | 162  | 7   | 139  | 3    |
| 227921_at    |         | 2007  | 47  | 1560  | 203  | 327  | 37  | 332  | 135  |
| 227492_at    |         | 1884  | 138 | 1875  | 121  | 2638 | 360 | 1813 | 1280 |
| 241535_at    |         | 1509  | 122 | 747   | 208  | 51   | 11  | 18   | 4    |
| 242346_x_at  |         | 1509  | 206 | 1137  | 162  | 214  | 20  | 54   | 41   |
| 211781_x_at  |         | 1486  | 108 | 1000  | 195  | 442  | 64  | 131  | 32   |
| 230785_at    |         | 1114  | 3   | 621   | 63   | 102  | 15  | 39   | 12   |
| 213484_at    |         | 1099  | 125 | 879   | 97   | 61   | 7   | 66   | 11   |
| 230356_at    |         | 1089  | 112 | 862   | 206  | 13   | 1   | 8    | 0    |
| 235363_at    |         | 1059  | 84  | 800   | 37   | 182  | 15  | 54   | 27   |
| 239231_at    |         | 1030  | 31  | 887   | 101  | 223  | 10  | 171  | 44   |

|              |  |      |     |      |     |     |     |      |     |
|--------------|--|------|-----|------|-----|-----|-----|------|-----|
| 1569023_a_at |  | 1021 | 178 | 1387 | 740 | 21  | 5   | 7    | 1   |
| 230423_at    |  | 986  | 112 | 813  | 95  | 40  | 3   | 41   | 3   |
| 242890_at    |  | 983  | 27  | 1047 | 104 | 168 | 27  | 44   | 25  |
| 227769_at    |  | 950  | 68  | 1184 | 95  | 156 | 18  | 18   | 4   |
| 226498_at    |  | 917  | 136 | 911  | 82  | 461 | 66  | 17   | 6   |
| 230312_at    |  | 807  | 20  | 736  | 143 | 236 | 22  | 143  | 7   |
| 236236_at    |  | 801  | 20  | 669  | 53  | 412 | 39  | 319  | 153 |
| 237193_s_at  |  | 792  | 136 | 809  | 170 | 92  | 28  | 15   | 1   |
| 231628_s_at  |  | 762  | 113 | 362  | 149 | 191 | 17  | 8    | 1   |
| 231690_at    |  | 739  | 37  | 418  | 57  | 53  | 11  | 254  | 98  |
| 232667_at    |  | 719  | 22  | 952  | 164 | 152 | 9   | 79   | 47  |
| 226497_s_at  |  | 658  | 103 | 612  | 58  | 395 | 52  | 25   | 3   |
| 240681_at    |  | 628  | 66  | 529  | 56  | 164 | 34  | 427  | 199 |
| 231079_at    |  | 604  | 11  | 586  | 68  | 37  | 2   | 37   | 4   |
| 230269_at    |  | 569  | 24  | 417  | 59  | 120 | 16  | 61   | 7   |
| 232254_at    |  | 544  | 38  | 551  | 104 | 169 | 21  | 58   | 24  |
| 230988_at    |  | 509  | 30  | 496  | 57  | 35  | 2   | 45   | 5   |
| 219987_at    |  | 509  | 19  | 495  | 90  | 183 | 49  | 30   | 5   |
| 240267_at    |  | 502  | 63  | 253  | 40  | 49  | 5   | 24   | 1   |
| 1560652_at   |  | 475  | 31  | 430  | 73  | 23  | 3   | 10   | 1   |
| 1556911_at   |  | 440  | 30  | 244  | 27  | 44  | 3   | 19   | 3   |
| 221648_s_at  |  | 432  | 23  | 326  | 49  | 472 | 219 | 1543 | 367 |
| 222033_s_at  |  | 431  | 35  | 339  | 57  | 272 | 19  | 42   | 12  |
| 227985_at    |  | 416  | 33  | 419  | 88  | 124 | 21  | 37   | 3   |
| 216319_at    |  | 395  | 59  | 221  | 47  | 10  | 1   | 12   | 3   |
| 243745_at    |  | 385  | 52  | 294  | 65  | 65  | 21  | 13   | 1   |
| 215594_at    |  | 384  | 48  | 354  | 130 | 226 | 80  | 62   | 29  |
| 237192_at    |  | 370  | 51  | 426  | 96  | 46  | 13  | 9    | 1   |
| 1556469_s_at |  | 369  | 51  | 196  | 64  | 35  | 3   | 12   | 2   |
| 1562828_at   |  | 347  | 22  | 215  | 51  | 78  | 23  | 13   | 2   |
| 217676_at    |  | 333  | 102 | 227  | 74  | 30  | 3   | 28   | 5   |
| 239292_at    |  | 320  | 5   | 257  | 40  | 194 | 14  | 27   | 13  |
| 231192_at    |  | 313  | 28  | 205  | 51  | 20  | 2   | 25   | 13  |
| 233142_at    |  | 304  | 11  | 343  | 43  | 66  | 6   | 24   | 5   |
| 222325_at    |  | 275  | 9   | 169  | 25  | 57  | 11  | 12   | 1   |
| 239994_at    |  | 271  | 4   | 208  | 20  | 43  | 1   | 30   | 2   |
| 231311_at    |  | 269  | 50  | 245  | 27  | 919 | 94  | 89   | 8   |
| 237275_at    |  | 257  | 51  | 522  | 345 | 37  | 6   | 15   | 1   |
| 1564083_at   |  | 252  | 75  | 85   | 19  | 13  | 1   | 13   | 0   |
| 1554887_at   |  | 249  | 32  | 294  | 30  | 24  | 3   | 20   | 1   |
| 240987_at    |  | 237  | 45  | 183  | 98  | 39  | 15  | 7    | 0   |
| 231644_at    |  | 234  | 56  | 192  | 43  | 209 | 32  | 143  | 85  |
| 228441_s_at  |  | 233  | 12  | 169  | 23  | 85  | 17  | 33   | 0   |
| 233413_at    |  | 229  | 79  | 188  | 54  | 524 | 68  | 11   | 0   |
| 241455_at    |  | 218  | 19  | 206  | 27  | 196 | 35  | 29   | 1   |
| 243229_at    |  | 189  | 13  | 147  | 20  | 39  | 2   | 26   | 4   |
| 241466_at    |  | 187  | 8   | 141  | 22  | 35  | 3   | 36   | 4   |
| 231470_at    |  | 164  | 92  | 136  | 44  | 22  | 5   | 10   | 0   |
| 232202_at    |  | 161  | 44  | 166  | 21  | 445 | 47  | 30   | 0   |
| 1563357_at   |  | 159  | 11  | 152  | 40  | 82  | 13  | 11   | 6   |

|            |  |     |    |     |     |     |    |     |     |
|------------|--|-----|----|-----|-----|-----|----|-----|-----|
| 228440_at  |  | 158 | 17 | 83  | 17  | 81  | 15 | 21  | 0   |
| 231594_at  |  | 152 | 57 | 99  | 30  | 19  | 1  | 17  | 1   |
| 230951_at  |  | 152 | 13 | 106 | 15  | 116 | 18 | 345 | 194 |
| 244867_at  |  | 148 | 27 | 208 | 62  | 21  | 2  | 8   | 0   |
| 238175_at  |  | 145 | 18 | 45  | 18  | 9   | 1  | 9   | 1   |
| 231925_at  |  | 144 | 11 | 232 | 105 | 101 | 18 | 15  | 2   |
| 241776_at  |  | 131 | 57 | 201 | 34  | 28  | 4  | 16  | 1   |
| 241772_at  |  | 117 | 32 | 106 | 24  | 34  | 5  | 8   | 1   |
| 1564964_at |  | 89  | 22 | 40  | 9   | 7   | 0  | 8   | 1   |

| PSC-FBs (5) |               | Tissue-FB (8) |               | PSC-NPC (6) |               | Fetal-NPC (5) |               |
|-------------|---------------|---------------|---------------|-------------|---------------|---------------|---------------|
| <i>avg</i>  | <i>stderr</i> | <i>avg</i>    | <i>stderr</i> | <i>avg</i>  | <i>stderr</i> | <i>avg</i>    | <i>stderr</i> |
| 113         | 18            | 101           | 18            | 300         | 59            | 197           | 24            |
| 8           | 0             | 8             | 0             | 8           | 0             | 8             | 1             |
| 50          | 15            | 30            | 3             | 33          | 4             | 31            | 5             |
| 1815        | 1118          | 1183          | 522           | 392         | 143           | 193           | 36            |
| 203         | 28            | 159           | 26            | 2901        | 209           | 711           | 187           |
| 81          | 28            | 33            | 3             | 118         | 36            | 35            | 4             |
| 73          | 13            | 66            | 6             | 379         | 86            | 560           | 126           |
| 25          | 3             | 35            | 4             | 115         | 17            | 192           | 25            |
| 84          | 21            | 91            | 43            | 777         | 174           | 142           | 61            |
| 54          | 3             | 35            | 2             | 1138        | 159           | 1639          | 207           |
| 69          | 32            | 22            | 3             | 43          | 7             | 39            | 10            |
| 76          | 10            | 69            | 26            | 86          | 6             | 31            | 6             |
| 170         | 42            | 12            | 2             | 1298        | 178           | 614           | 119           |
| 659         | 170           | 163           | 30            | 199         | 39            | 29            | 13            |
| 89          | 6             | 47            | 5             | 85          | 14            | 63            | 7             |
| 227         | 54            | 425           | 70            | 2418        | 630           | 1756          | 213           |
| 226         | 39            | 137           | 27            | 987         | 252           | 917           | 376           |
| 482         | 99            | 95            | 13            | 453         | 42            | 277           | 92            |
| 146         | 46            | 134           | 58            | 215         | 37            | 87            | 9             |
| 144         | 13            | 105           | 11            | 565         | 98            | 130           | 16            |
| 158         | 57            | 199           | 89            | 931         | 91            | 386           | 93            |
| 34          | 4             | 30            | 2             | 45          | 6             | 44            | 15            |
| 362         | 27            | 142           | 54            | 501         | 190           | 1235          | 817           |
| 132         | 6             | 118           | 13            | 336         | 59            | 199           | 23            |
| 16          | 0             | 13            | 1             | 103         | 19            | 81            | 45            |
| 1456        | 1267          | 513           | 202           | 4156        | 762           | 5305          | 1237          |
| 157         | 28            | 32            | 9             | 1214        | 164           | 973           | 309           |
| 156         | 31            | 118           | 26            | 85          | 12            | 214           | 17            |
| 55          | 11            | 66            | 22            | 302         | 29            | 170           | 24            |
| 51          | 7             | 61            | 9             | 112         | 20            | 41            | 5             |
| 145         | 47            | 233           | 93            | 829         | 62            | 559           | 99            |
| 337         | 116           | 459           | 173           | 1885        | 115           | 1174          | 226           |
| 113         | 23            | 155           | 52            | 353         | 16            | 281           | 29            |
| 234         | 53            | 237           | 37            | 483         | 31            | 301           | 56            |
| 60          | 9             | 66            | 19            | 122         | 8             | 61            | 6             |
| 49          | 2             | 43            | 11            | 133         | 33            | 55            | 21            |
| 96          | 3             | 91            | 3             | 115         | 19            | 82            | 4             |
| 188         | 53            | 210           | 20            | 1007        | 103           | 408           | 87            |
| 740         | 460           | 48            | 4             | 101         | 23            | 30            | 5             |
| 125         | 13            | 79            | 13            | 937         | 138           | 263           | 24            |
| 116         | 18            | 111           | 31            | 244         | 50            | 139           | 9             |
| 15          | 2             | 13            | 1             | 314         | 64            | 476           | 50            |
| 273         | 44            | 273           | 71            | 859         | 41            | 467           | 47            |
| 94          | 24            | 56            | 11            | 310         | 55            | 242           | 47            |
| 136         | 14            | 172           | 33            | 421         | 84            | 234           | 38            |
| 14          | 1             | 15            | 2             | 145         | 25            | 108           | 55            |
| 139         | 18            | 84            | 15            | 284         | 44            | 158           | 23            |
| 48          | 6             | 44            | 6             | 730         | 127           | 634           | 385           |

|      |      |     |     |      |      |      |      |
|------|------|-----|-----|------|------|------|------|
| 326  | 29   | 367 | 50  | 1355 | 64   | 646  | 93   |
| 68   | 7    | 54  | 5   | 444  | 106  | 116  | 14   |
| 16   | 0    | 14  | 1   | 283  | 173  | 612  | 282  |
| 14   | 1    | 13  | 1   | 46   | 11   | 18   | 2    |
| 91   | 12   | 95  | 20  | 1115 | 138  | 387  | 85   |
| 8    | 1    | 10  | 1   | 32   | 7    | 15   | 4    |
| 34   | 4    | 24  | 2   | 277  | 34   | 262  | 69   |
| 44   | 1    | 36  | 2   | 54   | 6    | 44   | 7    |
| 296  | 85   | 368 | 105 | 1484 | 126  | 762  | 124  |
| 485  | 171  | 582 | 185 | 2441 | 161  | 1386 | 360  |
| 226  | 98   | 45  | 14  | 1285 | 231  | 885  | 266  |
| 4014 | 2385 | 109 | 36  | 9649 | 794  | 6567 | 1176 |
| 140  | 34   | 135 | 45  | 653  | 99   | 260  | 56   |
| 137  | 49   | 182 | 85  | 252  | 18   | 179  | 16   |
| 166  | 38   | 196 | 51  | 1364 | 131  | 757  | 169  |
| 180  | 39   | 319 | 68  | 1263 | 107  | 955  | 211  |
| 31   | 8    | 20  | 8   | 710  | 166  | 132  | 68   |
| 331  | 127  | 68  | 3   | 610  | 117  | 198  | 21   |
| 84   | 24   | 29  | 2   | 153  | 24   | 90   | 16   |
| 70   | 25   | 101 | 31  | 183  | 44   | 109  | 12   |
| 104  | 36   | 142 | 28  | 797  | 258  | 473  | 87   |
| 90   | 9    | 93  | 10  | 244  | 26   | 170  | 27   |
| 62   | 15   | 124 | 25  | 481  | 61   | 269  | 52   |
| 32   | 3    | 34  | 2   | 31   | 4    | 27   | 3    |
| 184  | 46   | 74  | 12  | 280  | 33   | 266  | 113  |
| 163  | 38   | 36  | 13  | 1964 | 207  | 987  | 203  |
| 155  | 25   | 206 | 49  | 381  | 57   | 260  | 29   |
| 116  | 28   | 22  | 1   | 84   | 18   | 32   | 6    |
| 24   | 4    | 22  | 4   | 132  | 22   | 82   | 16   |
| 10   | 1    | 10  | 1   | 25   | 2    | 40   | 11   |
| 48   | 2    | 44  | 3   | 111  | 15   | 89   | 22   |
| 30   | 2    | 29  | 4   | 85   | 15   | 98   | 31   |
| 36   | 1    | 23  | 1   | 284  | 97   | 25   | 3    |
| 108  | 11   | 88  | 7   | 243  | 45   | 78   | 8    |
| 77   | 9    | 78  | 5   | 650  | 171  | 270  | 95   |
| 31   | 8    | 29  | 8   | 122  | 18   | 132  | 26   |
| 25   | 2    | 23  | 2   | 83   | 9    | 228  | 39   |
| 53   | 12   | 17  | 1   | 307  | 61   | 231  | 50   |
| 66   | 9    | 43  | 5   | 5100 | 1013 | 155  | 23   |
| 86   | 15   | 76  | 50  | 992  | 181  | 454  | 173  |
| 158  | 32   | 28  | 5   | 82   | 12   | 25   | 4    |
| 69   | 20   | 44  | 2   | 145  | 96   | 52   | 7    |
| 81   | 15   | 14  | 1   | 242  | 44   | 148  | 28   |
| 10   | 1    | 10  | 1   | 10   | 1    | 10   | 1    |
| 15   | 1    | 13  | 1   | 14   | 0    | 13   | 1    |
| 93   | 9    | 75  | 5   | 7308 | 1098 | 303  | 114  |
| 371  | 58   | 25  | 12  | 1438 | 148  | 1485 | 354  |
| 22   | 2    | 21  | 1   | 34   | 6    | 22   | 4    |
| 165  | 19   | 133 | 8   | 355  | 59   | 227  | 27   |
| 338  | 119  | 57  | 13  | 2570 | 398  | 1969 | 341  |

|      |     |      |     |      |      |       |      |
|------|-----|------|-----|------|------|-------|------|
| 29   | 4   | 15   | 1   | 87   | 13   | 70    | 13   |
| 43   | 19  | 146  | 86  | 53   | 18   | 124   | 73   |
| 46   | 5   | 32   | 2   | 237  | 95   | 35    | 4    |
| 201  | 106 | 40   | 4   | 51   | 9    | 32    | 3    |
| 31   | 13  | 20   | 5   | 419  | 33   | 112   | 20   |
| 10   | 1   | 8    | 1   | 8    | 2    | 8     | 1    |
| 97   | 43  | 129  | 42  | 1025 | 284  | 1809  | 291  |
| 77   | 7   | 58   | 10  | 115  | 17   | 58    | 8    |
| 36   | 3   | 35   | 4   | 96   | 10   | 168   | 49   |
| 55   | 18  | 73   | 29  | 707  | 63   | 331   | 77   |
| 152  | 27  | 200  | 23  | 119  | 22   | 87    | 11   |
| 216  | 71  | 354  | 124 | 1367 | 116  | 862   | 169  |
| 368  | 274 | 31   | 14  | 7327 | 1798 | 229   | 87   |
| 70   | 11  | 83   | 21  | 108  | 23   | 36    | 8    |
| 270  | 22  | 184  | 18  | 1032 | 66   | 485   | 55   |
| 143  | 17  | 112  | 13  | 1129 | 368  | 204   | 19   |
| 28   | 1   | 26   | 2   | 40   | 5    | 25    | 3    |
| 11   | 1   | 11   | 1   | 13   | 2    | 12    | 1    |
| 73   | 16  | 20   | 1   | 1353 | 180  | 83    | 32   |
| 177  | 54  | 25   | 4   | 601  | 106  | 77    | 30   |
| 131  | 21  | 188  | 56  | 373  | 28   | 288   | 26   |
| 1758 | 141 | 61   | 23  | 1564 | 176  | 409   | 162  |
| 279  | 111 | 447  | 203 | 1649 | 87   | 948   | 189  |
| 226  | 58  | 107  | 24  | 1188 | 161  | 853   | 87   |
| 53   | 13  | 115  | 80  | 2750 | 620  | 1173  | 167  |
| 52   | 14  | 32   | 6   | 71   | 19   | 73    | 16   |
| 14   | 2   | 13   | 1   | 45   | 15   | 34    | 16   |
| 554  | 144 | 251  | 65  | 299  | 40   | 65    | 15   |
| 72   | 8   | 48   | 3   | 390  | 58   | 65    | 4    |
| 100  | 18  | 83   | 14  | 154  | 19   | 109   | 56   |
| 39   | 13  | 23   | 2   | 42   | 12   | 25    | 7    |
| 27   | 4   | 25   | 3   | 792  | 230  | 67    | 21   |
| 44   | 4   | 47   | 7   | 66   | 9    | 39    | 6    |
| 156  | 80  | 26   | 3   | 644  | 103  | 423   | 132  |
| 41   | 3   | 46   | 2   | 60   | 5    | 49    | 5    |
| 132  | 28  | 28   | 5   | 161  | 32   | 30    | 6    |
| 52   | 8   | 40   | 6   | 556  | 220  | 198   | 131  |
| 76   | 11  | 112  | 38  | 177  | 23   | 99    | 9    |
| 25   | 1   | 20   | 1   | 215  | 83   | 20    | 3    |
| 56   | 7   | 44   | 4   | 108  | 23   | 40    | 10   |
| 306  | 102 | 28   | 4   | 1145 | 268  | 276   | 73   |
| 1402 | 343 | 212  | 118 | 902  | 221  | 1598  | 993  |
| 27   | 3   | 23   | 1   | 32   | 4    | 50    | 9    |
| 2233 | 283 | 1097 | 345 | 4994 | 459  | 11312 | 1191 |
| 396  | 73  | 262  | 33  | 456  | 45   | 272   | 31   |
| 37   | 3   | 36   | 5   | 119  | 31   | 200   | 56   |
| 66   | 27  | 13   | 2   | 248  | 117  | 59    | 17   |
| 42   | 10  | 24   | 4   | 248  | 32   | 265   | 18   |
| 10   | 1   | 10   | 1   | 15   | 2    | 10    | 1    |
| 208  | 54  | 144  | 26  | 172  | 23   | 127   | 23   |



|      |     |     |     |      |     |      |     |
|------|-----|-----|-----|------|-----|------|-----|
| 482  | 46  | 347 | 78  | 2520 | 178 | 564  | 36  |
| 220  | 67  | 402 | 210 | 855  | 47  | 542  | 104 |
| 40   | 2   | 37  | 3   | 41   | 5   | 38   | 2   |
| 189  | 56  | 83  | 6   | 153  | 44  | 38   | 10  |
| 1055 | 277 | 37  | 18  | 1096 | 162 | 1438 | 336 |
| 181  | 56  | 191 | 61  | 986  | 195 | 571  | 111 |
| 386  | 154 | 138 | 34  | 157  | 19  | 134  | 47  |
| 186  | 24  | 157 | 38  | 150  | 25  | 136  | 42  |
| 45   | 16  | 110 | 29  | 1875 | 274 | 1381 | 277 |
| 35   | 1   | 31  | 2   | 250  | 56  | 37   | 5   |
| 140  | 69  | 52  | 14  | 838  | 113 | 608  | 166 |
| 41   | 19  | 13  | 2   | 53   | 10  | 33   | 13  |
| 72   | 2   | 92  | 13  | 92   | 8   | 84   | 8   |
| 48   | 6   | 46  | 2   | 51   | 4   | 46   | 3   |
| 31   | 9   | 14  | 2   | 11   | 1   | 10   | 1   |
| 214  | 53  | 140 | 15  | 496  | 72  | 279  | 56  |
| 33   | 2   | 29  | 2   | 43   | 6   | 32   | 3   |
| 10   | 1   | 11  | 0   | 83   | 45  | 94   | 78  |
| 40   | 1   | 37  | 1   | 61   | 13  | 42   | 2   |
| 287  | 94  | 124 | 35  | 328  | 28  | 150  | 54  |
| 268  | 43  | 467 | 129 | 445  | 75  | 250  | 194 |
| 149  | 12  | 121 | 8   | 233  | 27  | 103  | 8   |
| 9    | 2   | 7   | 0   | 702  | 153 | 332  | 98  |
| 441  | 314 | 44  | 24  | 1191 | 257 | 80   | 13  |
| 60   | 24  | 61  | 14  | 1554 | 726 | 237  | 67  |
| 40   | 3   | 50  | 4   | 195  | 41  | 379  | 114 |
| 134  | 39  | 412 | 339 | 150  | 19  | 111  | 68  |
| 77   | 35  | 43  | 15  | 70   | 12  | 30   | 13  |
| 93   | 19  | 102 | 18  | 144  | 35  | 103  | 21  |
| 92   | 33  | 48  | 27  | 386  | 84  | 200  | 48  |
| 64   | 2   | 61  | 3   | 177  | 41  | 81   | 24  |
| 281  | 78  | 345 | 141 | 1823 | 259 | 1206 | 218 |
| 217  | 65  | 276 | 113 | 1439 | 155 | 986  | 245 |
| 6    | 0   | 6   | 0   | 8    | 1   | 6    | 0   |
| 73   | 4   | 76  | 12  | 1363 | 261 | 1550 | 146 |
| 177  | 105 | 55  | 11  | 39   | 4   | 111  | 19  |
| 20   | 6   | 17  | 4   | 185  | 37  | 126  | 28  |
| 319  | 182 | 35  | 4   | 2953 | 558 | 387  | 244 |
| 625  | 263 | 141 | 28  | 1166 | 168 | 912  | 206 |
| 48   | 9   | 26  | 1   | 76   | 11  | 29   | 3   |
| 32   | 7   | 21  | 3   | 31   | 5   | 44   | 22  |
| 21   | 2   | 28  | 2   | 419  | 71  | 171  | 35  |
| 16   | 2   | 19  | 2   | 38   | 10  | 31   | 6   |
| 566  | 223 | 95  | 27  | 884  | 104 | 2070 | 405 |
| 34   | 8   | 13  | 2   | 48   | 8   | 112  | 8   |
| 23   | 7   | 12  | 0   | 900  | 122 | 44   | 11  |
| 32   | 3   | 25  | 2   | 54   | 9   | 28   | 2   |
| 14   | 1   | 51  | 10  | 99   | 35  | 82   | 16  |
| 59   | 18  | 25  | 3   | 146  | 33  | 94   | 23  |
| 1146 | 186 | 933 | 170 | 2464 | 187 | 1351 | 94  |

|      |     |     |     |      |     |      |     |
|------|-----|-----|-----|------|-----|------|-----|
| 164  | 43  | 92  | 46  | 82   | 23  | 296  | 169 |
| 68   | 11  | 44  | 4   | 43   | 8   | 35   | 5   |
| 195  | 50  | 303 | 108 | 1028 | 154 | 488  | 88  |
| 32   | 5   | 53  | 18  | 91   | 11  | 105  | 20  |
| 15   | 1   | 14  | 1   | 518  | 375 | 16   | 3   |
| 36   | 1   | 43  | 4   | 100  | 42  | 46   | 6   |
| 40   | 14  | 22  | 1   | 187  | 46  | 631  | 168 |
| 202  | 33  | 133 | 17  | 1181 | 183 | 188  | 34  |
| 9    | 1   | 8   | 0   | 37   | 16  | 12   | 2   |
| 2362 | 277 | 663 | 146 | 5391 | 721 | 619  | 247 |
| 242  | 45  | 315 | 31  | 958  | 91  | 598  | 111 |
| 337  | 129 | 569 | 201 | 1612 | 188 | 564  | 90  |
| 27   | 7   | 11  | 1   | 151  | 25  | 19   | 2   |
| 40   | 10  | 22  | 2   | 61   | 13  | 28   | 3   |
| 298  | 95  | 17  | 2   | 322  | 66  | 232  | 22  |
| 517  | 155 | 14  | 1   | 1053 | 99  | 716  | 117 |
| 18   | 2   | 16  | 1   | 35   | 3   | 20   | 2   |
| 58   | 4   | 52  | 2   | 54   | 9   | 210  | 126 |
| 38   | 4   | 30  | 3   | 4790 | 382 | 250  | 78  |
| 558  | 72  | 93  | 13  | 1454 | 175 | 175  | 14  |
| 1429 | 149 | 660 | 167 | 2909 | 450 | 1474 | 343 |
| 96   | 12  | 122 | 24  | 323  | 62  | 154  | 31  |
| 45   | 11  | 27  | 3   | 1641 | 239 | 1280 | 811 |
| 124  | 23  | 184 | 34  | 3145 | 394 | 1923 | 354 |
| 336  | 98  | 318 | 43  | 444  | 56  | 176  | 25  |
| 606  | 43  | 402 | 90  | 846  | 75  | 680  | 77  |
| 724  | 427 | 19  | 6   | 483  | 46  | 538  | 107 |
| 25   | 11  | 17  | 3   | 380  | 74  | 73   | 18  |
| 50   | 2   | 47  | 3   | 86   | 25  | 47   | 7   |
| 93   | 18  | 44  | 5   | 186  | 39  | 307  | 126 |
| 330  | 41  | 271 | 29  | 1380 | 224 | 604  | 29  |
| 337  | 147 | 25  | 2   | 79   | 21  | 241  | 91  |
| 18   | 2   | 13  | 1   | 159  | 41  | 168  | 62  |
| 1603 | 550 | 34  | 4   | 696  | 125 | 1410 | 319 |
| 97   | 16  | 54  | 24  | 79   | 19  | 62   | 12  |
| 20   | 3   | 12  | 1   | 38   | 12  | 230  | 78  |
| 12   | 1   | 11  | 0   | 22   | 7   | 11   | 1   |
| 40   | 3   | 44  | 5   | 132  | 19  | 38   | 6   |
| 623  | 363 | 32  | 12  | 143  | 42  | 76   | 27  |
| 36   | 3   | 53  | 9   | 53   | 9   | 56   | 4   |
| 623  | 309 | 31  | 3   | 342  | 142 | 380  | 171 |
| 84   | 19  | 44  | 4   | 247  | 26  | 239  | 12  |
| 162  | 22  | 105 | 34  | 427  | 46  | 82   | 11  |
| 72   | 15  | 35  | 3   | 57   | 6   | 47   | 2   |
| 72   | 16  | 44  | 5   | 365  | 53  | 100  | 24  |
| 47   | 4   | 33  | 3   | 210  | 65  | 42   | 3   |
| 91   | 26  | 137 | 36  | 1374 | 131 | 922  | 224 |
| 255  | 32  | 280 | 52  | 337  | 30  | 379  | 25  |
| 47   | 3   | 45  | 3   | 52   | 5   | 46   | 6   |
| 39   | 2   | 36  | 3   | 52   | 9   | 42   | 6   |

|       |      |     |     |      |      |      |     |
|-------|------|-----|-----|------|------|------|-----|
| 13634 | 2598 | 674 | 346 | 2487 | 429  | 163  | 44  |
| 1951  | 1005 | 410 | 283 | 693  | 204  | 16   | 3   |
| 5076  | 2073 | 135 | 10  | 1344 | 293  | 95   | 7   |
| 48    | 10   | 51  | 7   | 701  | 354  | 52   | 16  |
| 78    | 22   | 82  | 26  | 441  | 60   | 224  | 25  |
| 629   | 92   | 564 | 85  | 905  | 159  | 1141 | 333 |
| 37    | 3    | 30  | 2   | 46   | 5    | 35   | 4   |
| 27    | 2    | 24  | 1   | 53   | 8    | 143  | 72  |
| 27    | 1    | 25  | 3   | 34   | 4    | 29   | 2   |
| 58    | 5    | 42  | 3   | 84   | 16   | 140  | 67  |
| 19    | 3    | 15  | 1   | 3502 | 1223 | 20   | 7   |
| 230   | 122  | 12  | 1   | 2952 | 460  | 23   | 5   |
| 102   | 13   | 82  | 8   | 746  | 157  | 482  | 179 |
| 15    | 2    | 13  | 1   | 36   | 14   | 18   | 5   |
| 140   | 39   | 32  | 3   | 289  | 75   | 133  | 28  |
| 51    | 12   | 30  | 3   | 49   | 4    | 72   | 19  |
| 26    | 2    | 23  | 1   | 63   | 12   | 143  | 82  |
| 47    | 24   | 48  | 15  | 124  | 40   | 191  | 40  |
| 24    | 2    | 23  | 1   | 31   | 4    | 35   | 6   |
| 246   | 84   | 10  | 0   | 224  | 30   | 14   | 3   |
| 49    | 4    | 42  | 3   | 129  | 38   | 88   | 9   |
| 39    | 6    | 20  | 1   | 76   | 14   | 39   | 7   |
| 1679  | 192  | 82  | 27  | 2601 | 233  | 81   | 44  |
| 50    | 17   | 9   | 1   | 84   | 22   | 6    | 1   |
| 50    | 6    | 81  | 23  | 187  | 19   | 133  | 28  |
| 22    | 1    | 17  | 1   | 19   | 2    | 18   | 2   |
| 57    | 6    | 33  | 2   | 82   | 9    | 33   | 5   |
| 35    | 5    | 27  | 2   | 81   | 19   | 118  | 25  |
| 45    | 10   | 33  | 1   | 160  | 29   | 128  | 46  |
| 33    | 6    | 63  | 15  | 179  | 16   | 117  | 28  |
| 9     | 0    | 9   | 0   | 13   | 2    | 10   | 0   |
| 152   | 37   | 18  | 10  | 1994 | 274  | 1551 | 194 |
| 52    | 9    | 86  | 8   | 221  | 68   | 41   | 10  |
| 304   | 40   | 388 | 69  | 447  | 67   | 224  | 14  |
| 21    | 1    | 18  | 1   | 26   | 4    | 19   | 2   |
| 631   | 176  | 733 | 242 | 2673 | 147  | 1419 | 183 |
| 476   | 265  | 14  | 2   | 279  | 72   | 79   | 32  |
| 121   | 34   | 22  | 2   | 157  | 40   | 123  | 52  |
| 19    | 4    | 86  | 20  | 180  | 29   | 160  | 35  |
| 199   | 23   | 147 | 14  | 248  | 71   | 153  | 17  |
| 56    | 3    | 54  | 3   | 63   | 5    | 56   | 6   |
| 47    | 7    | 83  | 10  | 53   | 7    | 30   | 5   |
| 13    | 1    | 16  | 1   | 365  | 78   | 115  | 51  |
| 131   | 43   | 252 | 153 | 529  | 23   | 441  | 80  |
| 445   | 94   | 538 | 132 | 1822 | 211  | 1004 | 220 |
| 89    | 9    | 140 | 46  | 275  | 31   | 265  | 30  |
| 244   | 85   | 339 | 104 | 809  | 88   | 597  | 133 |
| 36    | 13   | 53  | 8   | 58   | 16   | 21   | 3   |
| 289   | 16   | 354 | 33  | 401  | 55   | 249  | 39  |
| 93    | 45   | 13  | 3   | 1343 | 302  | 2568 | 751 |

|      |     |     |     |      |     |      |     |
|------|-----|-----|-----|------|-----|------|-----|
| 28   | 3   | 59  | 12  | 783  | 325 | 459  | 219 |
| 36   | 4   | 62  | 13  | 151  | 48  | 32   | 8   |
| 416  | 153 | 619 | 267 | 2158 | 257 | 1404 | 486 |
| 50   | 17  | 79  | 35  | 468  | 64  | 201  | 41  |
| 92   | 27  | 19  | 5   | 44   | 11  | 12   | 2   |
| 61   | 24  | 67  | 17  | 501  | 107 | 329  | 62  |
| 314  | 40  | 227 | 20  | 440  | 32  | 145  | 26  |
| 314  | 56  | 339 | 67  | 1137 | 69  | 825  | 127 |
| 368  | 13  | 331 | 22  | 512  | 31  | 193  | 18  |
| 524  | 42  | 396 | 37  | 1614 | 215 | 560  | 80  |
| 45   | 22  | 24  | 7   | 2338 | 69  | 1039 | 431 |
| 138  | 21  | 95  | 23  | 801  | 107 | 602  | 131 |
| 55   | 8   | 40  | 2   | 276  | 95  | 192  | 42  |
| 289  | 39  | 174 | 22  | 748  | 39  | 404  | 73  |
| 124  | 58  | 19  | 2   | 238  | 34  | 31   | 9   |
| 26   | 3   | 29  | 2   | 146  | 66  | 49   | 6   |
| 45   | 13  | 45  | 13  | 206  | 60  | 252  | 68  |
| 1138 | 251 | 336 | 92  | 1092 | 135 | 1460 | 168 |
| 554  | 73  | 845 | 96  | 4059 | 282 | 1735 | 289 |
| 18   | 1   | 18  | 1   | 133  | 27  | 99   | 21  |
| 71   | 28  | 22  | 2   | 430  | 104 | 223  | 68  |
| 54   | 4   | 51  | 7   | 2986 | 712 | 1960 | 806 |
| 102  | 34  | 86  | 29  | 40   | 3   | 98   | 42  |
| 18   | 1   | 18  | 1   | 468  | 142 | 99   | 76  |
| 87   | 40  | 102 | 43  | 1077 | 170 | 2232 | 209 |
| 61   | 27  | 20  | 2   | 150  | 79  | 37   | 6   |
| 89   | 45  | 22  | 2   | 652  | 67  | 243  | 34  |
| 90   | 6   | 78  | 2   | 76   | 12  | 73   | 4   |
| 940  | 505 | 48  | 3   | 470  | 291 | 35   | 3   |
| 28   | 10  | 7   | 1   | 100  | 62  | 14   | 1   |
| 84   | 4   | 63  | 6   | 320  | 42  | 70   | 5   |
| 128  | 4   | 109 | 5   | 412  | 109 | 105  | 3   |
| 18   | 1   | 15  | 2   | 353  | 113 | 38   | 14  |
| 87   | 8   | 63  | 5   | 433  | 71  | 227  | 48  |
| 16   | 5   | 9   | 1   | 132  | 21  | 21   | 2   |
| 21   | 3   | 22  | 4   | 28   | 5   | 25   | 4   |
| 173  | 52  | 211 | 91  | 936  | 41  | 666  | 133 |
| 41   | 4   | 46  | 10  | 111  | 11  | 62   | 10  |
| 791  | 248 | 222 | 50  | 162  | 47  | 81   | 34  |
| 10   | 1   | 10  | 1   | 1175 | 567 | 176  | 114 |
| 24   | 1   | 24  | 2   | 34   | 4   | 20   | 2   |
| 35   | 9   | 40  | 8   | 833  | 167 | 522  | 335 |
| 36   | 3   | 31  | 3   | 166  | 19  | 85   | 13  |
| 10   | 1   | 8   | 0   | 13   | 2   | 11   | 1   |
| 95   | 47  | 18  | 4   | 190  | 22  | 86   | 20  |
| 1258 | 105 | 32  | 4   | 929  | 142 | 702  | 87  |
| 749  | 89  | 86  | 8   | 732  | 111 | 125  | 35  |
| 298  | 60  | 43  | 11  | 512  | 158 | 277  | 39  |
| 34   | 11  | 21  | 2   | 88   | 18  | 215  | 30  |
| 146  | 15  | 163 | 21  | 872  | 110 | 412  | 93  |

|      |     |     |     |      |     |      |     |
|------|-----|-----|-----|------|-----|------|-----|
| 1302 | 686 | 97  | 27  | 400  | 65  | 752  | 188 |
| 26   | 6   | 19  | 3   | 127  | 69  | 150  | 60  |
| 379  | 57  | 357 | 76  | 1119 | 186 | 611  | 18  |
| 254  | 18  | 289 | 27  | 729  | 52  | 649  | 84  |
| 310  | 21  | 337 | 42  | 752  | 56  | 601  | 52  |
| 168  | 19  | 130 | 15  | 207  | 24  | 155  | 15  |
| 106  | 9   | 92  | 6   | 123  | 15  | 113  | 10  |
| 37   | 12  | 17  | 2   | 248  | 49  | 321  | 150 |
| 1079 | 146 | 20  | 4   | 1273 | 240 | 414  | 211 |
| 836  | 370 | 10  | 2   | 193  | 30  | 28   | 5   |
| 310  | 105 | 319 | 50  | 353  | 69  | 925  | 194 |
| 59   | 9   | 40  | 5   | 144  | 16  | 86   | 27  |
| 28   | 0   | 42  | 11  | 507  | 115 | 183  | 47  |
| 49   | 8   | 29  | 5   | 183  | 46  | 123  | 25  |
| 103  | 27  | 49  | 6   | 341  | 71  | 236  | 31  |
| 33   | 14  | 17  | 1   | 1010 | 349 | 532  | 277 |
| 66   | 8   | 36  | 13  | 146  | 15  | 104  | 24  |
| 1126 | 369 | 862 | 331 | 825  | 172 | 568  | 231 |
| 254  | 101 | 761 | 470 | 1153 | 145 | 1003 | 152 |
| 126  | 35  | 161 | 69  | 460  | 20  | 288  | 33  |
| 151  | 39  | 107 | 27  | 94   | 17  | 47   | 11  |
| 151  | 14  | 127 | 4   | 398  | 194 | 123  | 14  |
| 176  | 11  | 144 | 5   | 399  | 181 | 131  | 7   |
| 42   | 5   | 40  | 2   | 134  | 71  | 36   | 4   |
| 61   | 8   | 44  | 2   | 140  | 63  | 51   | 4   |
| 67   | 6   | 67  | 13  | 45   | 5   | 56   | 9   |
| 264  | 25  | 196 | 35  | 561  | 77  | 468  | 101 |
| 97   | 10  | 34  | 6   | 137  | 32  | 41   | 8   |
| 22   | 6   | 34  | 13  | 492  | 92  | 524  | 87  |
| 206  | 122 | 32  | 9   | 306  | 89  | 1833 | 490 |
| 48   | 21  | 26  | 3   | 80   | 31  | 114  | 34  |
| 17   | 4   | 37  | 16  | 96   | 28  | 23   | 6   |
| 70   | 3   | 68  | 4   | 89   | 16  | 66   | 7   |
| 722  | 100 | 227 | 40  | 303  | 73  | 208  | 103 |
| 153  | 40  | 222 | 83  | 706  | 91  | 467  | 100 |
| 63   | 7   | 46  | 3   | 97   | 12  | 62   | 3   |
| 37   | 20  | 14  | 2   | 1560 | 192 | 1606 | 445 |
| 26   | 6   | 14  | 1   | 43   | 15  | 12   | 1   |
| 49   | 3   | 37  | 3   | 174  | 56  | 34   | 3   |
| 25   | 3   | 24  | 3   | 3405 | 733 | 50   | 14  |
| 179  | 22  | 234 | 25  | 671  | 48  | 579  | 104 |
| 14   | 4   | 8   | 1   | 2576 | 570 | 7628 | 757 |
| 24   | 3   | 24  | 4   | 144  | 43  | 21   | 1   |
| 216  | 9   | 221 | 32  | 430  | 46  | 464  | 35  |
| 300  | 120 | 421 | 170 | 1377 | 197 | 763  | 154 |
| 49   | 11  | 23  | 5   | 40   | 3   | 36   | 2   |
| 33   | 10  | 47  | 15  | 51   | 12  | 52   | 9   |
| 102  | 18  | 98  | 23  | 452  | 73  | 407  | 122 |
| 379  | 184 | 55  | 14  | 193  | 23  | 110  | 11  |
| 917  | 422 | 169 | 42  | 1718 | 131 | 397  | 68  |

|      |     |      |     |      |     |      |     |
|------|-----|------|-----|------|-----|------|-----|
| 1305 | 86  | 1000 | 76  | 2526 | 100 | 1222 | 49  |
| 325  | 93  | 416  | 127 | 839  | 64  | 682  | 60  |
| 890  | 453 | 117  | 61  | 1247 | 501 | 142  | 45  |
| 12   | 1   | 11   | 0   | 51   | 27  | 18   | 2   |
| 11   | 1   | 10   | 1   | 942  | 251 | 59   | 10  |
| 78   | 10  | 65   | 6   | 545  | 48  | 264  | 16  |
| 23   | 2   | 13   | 1   | 27   | 7   | 32   | 18  |
| 61   | 4   | 71   | 8   | 137  | 17  | 106  | 25  |
| 782  | 226 | 399  | 92  | 453  | 187 | 178  | 93  |
| 170  | 88  | 38   | 8   | 495  | 132 | 443  | 140 |
| 1261 | 260 | 174  | 47  | 2130 | 126 | 182  | 62  |
| 123  | 15  | 57   | 5   | 374  | 36  | 222  | 43  |
| 312  | 62  | 402  | 53  | 54   | 7   | 37   | 14  |
| 336  | 20  | 241  | 46  | 2702 | 421 | 1308 | 103 |
| 19   | 1   | 15   | 1   | 127  | 44  | 1077 | 224 |
| 135  | 21  | 105  | 8   | 592  | 90  | 120  | 11  |
| 48   | 2   | 39   | 2   | 1166 | 199 | 833  | 326 |
| 9    | 1   | 8    | 0   | 100  | 30  | 150  | 90  |
| 31   | 3   | 32   | 3   | 38   | 8   | 32   | 5   |
| 52   | 13  | 35   | 2   | 91   | 26  | 27   | 2   |
| 52   | 17  | 37   | 12  | 196  | 35  | 134  | 38  |
| 229  | 90  | 56   | 8   | 1031 | 192 | 1387 | 266 |
| 10   | 1   | 11   | 0   | 11   | 0   | 18   | 8   |
| 531  | 53  | 412  | 49  | 1543 | 67  | 915  | 148 |
| 852  | 353 | 157  | 46  | 437  | 211 | 51   | 27  |
| 484  | 458 | 420  | 191 | 3508 | 716 | 573  | 202 |
| 563  | 293 | 58   | 6   | 310  | 46  | 296  | 105 |
| 520  | 380 | 11   | 2   | 649  | 192 | 222  | 86  |
| 64   | 8   | 60   | 5   | 447  | 105 | 67   | 7   |
| 194  | 92  | 92   | 28  | 276  | 66  | 63   | 12  |
| 556  | 24  | 368  | 46  | 536  | 116 | 483  | 76  |
| 28   | 4   | 24   | 3   | 117  | 17  | 56   | 8   |
| 79   | 5   | 39   | 5   | 500  | 21  | 612  | 90  |
| 9    | 0   | 8    | 1   | 309  | 87  | 96   | 54  |
| 358  | 21  | 214  | 46  | 1062 | 105 | 340  | 45  |
| 10   | 1   | 12   | 3   | 18   | 2   | 11   | 1   |
| 694  | 133 | 670  | 143 | 1953 | 456 | 421  | 44  |
| 1097 | 202 | 954  | 260 | 3038 | 545 | 574  | 48  |
| 712  | 317 | 243  | 179 | 267  | 31  | 349  | 171 |
| 83   | 11  | 109  | 10  | 71   | 8   | 56   | 8   |
| 45   | 22  | 48   | 12  | 73   | 10  | 47   | 10  |
| 41   | 5   | 33   | 4   | 349  | 62  | 98   | 20  |
| 16   | 1   | 12   | 1   | 25   | 6   | 27   | 6   |
| 15   | 3   | 14   | 2   | 18   | 2   | 11   | 1   |
| 29   | 3   | 19   | 2   | 24   | 4   | 18   | 1   |
| 535  | 79  | 282  | 71  | 808  | 111 | 631  | 121 |
| 1163 | 105 | 912  | 171 | 1785 | 138 | 1517 | 139 |
| 38   | 17  | 23   | 3   | 393  | 146 | 55   | 8   |
| 53   | 12  | 55   | 29  | 502  | 59  | 471  | 138 |
| 13   | 3   | 17   | 6   | 6639 | 629 | 7734 | 949 |

|      |     |     |     |      |     |      |     |
|------|-----|-----|-----|------|-----|------|-----|
| 70   | 22  | 119 | 67  | 347  | 37  | 227  | 41  |
| 46   | 11  | 33  | 3   | 169  | 60  | 34   | 2   |
| 134  | 33  | 43  | 3   | 149  | 29  | 42   | 5   |
| 708  | 311 | 107 | 26  | 716  | 118 | 138  | 41  |
| 124  | 20  | 65  | 8   | 452  | 37  | 199  | 50  |
| 494  | 432 | 8   | 0   | 311  | 135 | 201  | 78  |
| 165  | 62  | 25  | 9   | 634  | 102 | 173  | 25  |
| 25   | 3   | 39  | 10  | 391  | 71  | 393  | 32  |
| 162  | 68  | 118 | 97  | 777  | 125 | 779  | 209 |
| 136  | 19  | 129 | 18  | 687  | 59  | 416  | 78  |
| 202  | 31  | 104 | 22  | 420  | 78  | 494  | 44  |
| 43   | 3   | 43  | 4   | 60   | 3   | 97   | 15  |
| 7    | 0   | 7   | 0   | 548  | 446 | 563  | 539 |
| 90   | 16  | 110 | 27  | 136  | 9   | 61   | 15  |
| 9    | 1   | 10  | 1   | 10   | 1   | 19   | 5   |
| 72   | 22  | 40  | 2   | 468  | 308 | 41   | 2   |
| 40   | 2   | 23  | 2   | 187  | 26  | 172  | 27  |
| 314  | 53  | 168 | 24  | 131  | 21  | 69   | 17  |
| 997  | 231 | 539 | 20  | 1062 | 111 | 716  | 23  |
| 145  | 20  | 143 | 22  | 1003 | 141 | 255  | 59  |
| 22   | 1   | 18  | 1   | 20   | 1   | 19   | 1   |
| 10   | 1   | 8   | 1   | 44   | 12  | 61   | 30  |
| 260  | 32  | 252 | 38  | 546  | 60  | 341  | 40  |
| 79   | 9   | 57  | 5   | 239  | 23  | 172  | 22  |
| 194  | 43  | 317 | 43  | 2442 | 152 | 1326 | 539 |
| 60   | 3   | 52  | 3   | 99   | 19  | 63   | 7   |
| 18   | 3   | 21  | 2   | 40   | 15  | 18   | 5   |
| 12   | 2   | 14  | 5   | 9    | 0   | 9    | 1   |
| 14   | 1   | 12  | 1   | 20   | 5   | 344  | 321 |
| 16   | 0   | 15  | 1   | 23   | 5   | 14   | 1   |
| 35   | 2   | 25  | 2   | 72   | 23  | 22   | 1   |
| 267  | 130 | 82  | 23  | 153  | 34  | 40   | 5   |
| 739  | 408 | 73  | 25  | 647  | 107 | 355  | 139 |
| 1006 | 299 | 488 | 90  | 675  | 90  | 230  | 72  |
| 71   | 40  | 46  | 15  | 29   | 3   | 62   | 39  |
| 405  | 35  | 191 | 26  | 1270 | 102 | 1196 | 200 |
| 26   | 3   | 17  | 2   | 317  | 115 | 409  | 187 |
| 252  | 15  | 205 | 31  | 197  | 44  | 51   | 8   |
| 33   | 10  | 8   | 1   | 91   | 26  | 208  | 72  |
| 180  | 67  | 267 | 111 | 918  | 55  | 571  | 120 |
| 363  | 225 | 175 | 70  | 5115 | 356 | 6165 | 532 |
| 812  | 292 | 923 | 385 | 3873 | 255 | 1952 | 440 |
| 7    | 0   | 8   | 0   | 94   | 11  | 247  | 50  |
| 19   | 1   | 24  | 3   | 247  | 67  | 333  | 61  |
| 25   | 4   | 107 | 53  | 215  | 71  | 39   | 6   |
| 326  | 170 | 33  | 6   | 308  | 93  | 69   | 29  |
| 230  | 53  | 49  | 18  | 2144 | 228 | 1236 | 232 |
| 56   | 19  | 59  | 37  | 214  | 52  | 204  | 63  |
| 171  | 24  | 49  | 11  | 157  | 37  | 272  | 41  |
| 8    | 0   | 9   | 0   | 18   | 5   | 8    | 0   |

|     |     |     |    |      |     |      |     |
|-----|-----|-----|----|------|-----|------|-----|
| 69  | 7   | 107 | 21 | 275  | 31  | 182  | 28  |
| 37  | 5   | 39  | 8  | 97   | 17  | 51   | 3   |
| 17  | 1   | 17  | 1  | 76   | 33  | 66   | 26  |
| 55  | 6   | 55  | 6  | 220  | 59  | 602  | 256 |
| 52  | 6   | 20  | 2  | 349  | 64  | 240  | 46  |
| 19  | 5   | 10  | 1  | 31   | 7   | 20   | 4   |
| 94  | 64  | 14  | 1  | 109  | 64  | 15   | 2   |
| 59  | 6   | 52  | 5  | 294  | 69  | 115  | 10  |
| 176 | 100 | 12  | 1  | 2671 | 509 | 1536 | 302 |
| 34  | 9   | 23  | 2  | 484  | 157 | 191  | 53  |
| 83  | 26  | 110 | 16 | 217  | 16  | 295  | 47  |
| 25  | 2   | 15  | 2  | 93   | 3   | 59   | 15  |
| 12  | 1   | 16  | 1  | 29   | 7   | 17   | 1   |
| 37  | 15  | 26  | 9  | 167  | 37  | 55   | 21  |
| 45  | 5   | 53  | 8  | 212  | 43  | 180  | 37  |
| 237 | 26  | 71  | 17 | 256  | 68  | 169  | 20  |
| 155 | 48  | 92  | 30 | 3108 | 256 | 2023 | 396 |
| 30  | 5   | 47  | 6  | 179  | 41  | 82   | 24  |
| 146 | 11  | 153 | 12 | 235  | 25  | 172  | 12  |
| 47  | 5   | 29  | 6  | 76   | 6   | 53   | 9   |
| 48  | 4   | 62  | 5  | 71   | 10  | 70   | 7   |
| 79  | 14  | 78  | 16 | 380  | 31  | 253  | 17  |
| 43  | 3   | 53  | 8  | 173  | 36  | 107  | 16  |
| 350 | 49  | 341 | 49 | 2264 | 343 | 1057 | 240 |
| 52  | 4   | 98  | 11 | 87   | 14  | 105  | 11  |
| 36  | 3   | 41  | 5  | 57   | 12  | 50   | 8   |
| 29  | 2   | 46  | 9  | 178  | 42  | 49   | 18  |
| 112 | 24  | 58  | 9  | 139  | 29  | 79   | 11  |
| 178 | 31  | 171 | 23 | 554  | 31  | 456  | 85  |
| 73  | 2   | 65  | 4  | 62   | 8   | 65   | 5   |
| 115 | 12  | 145 | 12 | 764  | 381 | 132  | 27  |
| 24  | 3   | 22  | 4  | 2299 | 578 | 39   | 8   |
| 11  | 0   | 62  | 44 | 201  | 34  | 12   | 1   |
| 68  | 10  | 99  | 31 | 537  | 67  | 458  | 53  |
| 27  | 5   | 20  | 2  | 1245 | 181 | 616  | 182 |
| 177 | 58  | 29  | 8  | 1465 | 212 | 1171 | 235 |
| 54  | 23  | 38  | 2  | 588  | 552 | 25   | 3   |
| 9   | 1   | 10  | 1  | 54   | 29  | 10   | 1   |
| 510 | 125 | 266 | 32 | 1134 | 132 | 744  | 148 |
| 192 | 5   | 185 | 23 | 226  | 36  | 190  | 14  |
| 236 | 55  | 200 | 47 | 1349 | 320 | 721  | 188 |
| 129 | 46  | 133 | 37 | 342  | 75  | 200  | 40  |
| 33  | 8   | 57  | 23 | 148  | 48  | 42   | 10  |
| 55  | 6   | 60  | 13 | 215  | 42  | 171  | 23  |
| 183 | 33  | 81  | 5  | 272  | 53  | 147  | 48  |
| 49  | 2   | 37  | 3  | 127  | 32  | 716  | 115 |
| 61  | 5   | 60  | 7  | 335  | 81  | 698  | 170 |
| 9   | 0   | 8   | 0  | 22   | 6   | 9    | 0   |
| 71  | 14  | 93  | 26 | 388  | 39  | 361  | 59  |
| 147 | 6   | 173 | 17 | 243  | 65  | 170  | 21  |



|      |     |     |    |     |     |     |     |
|------|-----|-----|----|-----|-----|-----|-----|
| 8    | 0   | 7   | 0  | 8   | 1   | 8   | 0   |
| 44   | 4   | 40  | 2  | 103 | 33  | 53  | 17  |
| 110  | 36  | 121 | 71 | 355 | 24  | 186 | 30  |
| 42   | 10  | 16  | 2  | 634 | 136 | 593 | 319 |
| 1036 | 455 | 92  | 45 | 58  | 21  | 60  | 36  |
| 79   | 17  | 75  | 15 | 363 | 108 | 182 | 24  |
| 125  | 7   | 46  | 9  | 715 | 89  | 539 | 93  |
| 18   | 2   | 16  | 1  | 27  | 5   | 15  | 1   |
| 18   | 8   | 9   | 0  | 499 | 317 | 9   | 1   |
| 17   | 1   | 19  | 2  | 22  | 4   | 15  | 2   |
| 283  | 48  | 128 | 18 | 175 | 26  | 65  | 10  |
| 609  | 269 | 74  | 31 | 48  | 11  | 48  | 22  |
| 15   | 1   | 25  | 6  | 43  | 19  | 19  | 4   |
| 47   | 2   | 41  | 2  | 49  | 6   | 37  | 3   |
| 74   | 3   | 63  | 4  | 89  | 9   | 80  | 7   |
| 67   | 16  | 93  | 12 | 90  | 11  | 73  | 12  |
| 41   | 3   | 33  | 3  | 111 | 10  | 171 | 30  |
| 27   | 3   | 25  | 1  | 45  | 4   | 27  | 3   |
| 24   | 1   | 22  | 1  | 27  | 2   | 34  | 2   |
| 11   | 1   | 11  | 1  | 139 | 54  | 21  | 3   |
| 35   | 5   | 31  | 8  | 75  | 17  | 45  | 8   |
| 47   | 9   | 47  | 7  | 42  | 10  | 29  | 4   |
| 209  | 88  | 80  | 28 | 45  | 4   | 40  | 12  |
| 45   | 3   | 45  | 4  | 56  | 14  | 38  | 3   |
| 9    | 0   | 11  | 1  | 23  | 6   | 18  | 8   |
| 22   | 3   | 51  | 8  | 53  | 7   | 67  | 13  |
| 60   | 8   | 42  | 3  | 169 | 44  | 33  | 3   |
| 12   | 1   | 11  | 0  | 16  | 2   | 10  | 0   |
| 11   | 0   | 11  | 0  | 11  | 1   | 11  | 1   |
| 16   | 1   | 16  | 1  | 71  | 17  | 91  | 17  |
| 31   | 1   | 26  | 2  | 38  | 11  | 28  | 2   |
| 111  | 41  | 48  | 13 | 53  | 13  | 35  | 6   |
| 16   | 1   | 26  | 4  | 27  | 4   | 16  | 0   |
| 31   | 4   | 29  | 2  | 275 | 80  | 130 | 37  |
| 9    | 1   | 9   | 1  | 538 | 176 | 50  | 12  |
| 33   | 1   | 34  | 2  | 40  | 3   | 40  | 3   |
| 201  | 79  | 20  | 2  | 177 | 29  | 79  | 19  |
| 17   | 1   | 17  | 1  | 18  | 1   | 14  | 1   |
| 19   | 1   | 20  | 5  | 24  | 3   | 30  | 3   |
| 16   | 1   | 14  | 0  | 21  | 2   | 16  | 1   |
| 9    | 1   | 9   | 0  | 8   | 0   | 8   | 1   |
| 17   | 3   | 10  | 1  | 29  | 15  | 20  | 6   |
| 21   | 2   | 17  | 1  | 19  | 2   | 14  | 1   |
| 12   | 1   | 10  | 0  | 37  | 5   | 12  | 1   |
| 50   | 6   | 65  | 11 | 28  | 3   | 23  | 3   |
| 28   | 2   | 27  | 3  | 44  | 8   | 27  | 3   |
| 35   | 2   | 31  | 2  | 44  | 5   | 25  | 1   |
| 9    | 0   | 11  | 1  | 29  | 9   | 39  | 12  |
| 60   | 17  | 20  | 1  | 63  | 14  | 24  | 2   |
| 23   | 8   | 11  | 2  | 18  | 8   | 6   | 0   |

|    |   |    |   |     |    |     |    |
|----|---|----|---|-----|----|-----|----|
| 12 | 1 | 11 | 1 | 13  | 1  | 10  | 1  |
| 21 | 1 | 18 | 1 | 23  | 6  | 15  | 1  |
| 18 | 4 | 11 | 1 | 19  | 4  | 13  | 2  |
| 9  | 0 | 9  | 0 | 12  | 2  | 9   | 0  |
| 9  | 0 | 9  | 0 | 9   | 0  | 9   | 0  |
| 12 | 3 | 12 | 1 | 170 | 80 | 138 | 20 |
| 27 | 3 | 22 | 2 | 57  | 12 | 38  | 8  |
| 8  | 0 | 9  | 1 | 56  | 13 | 67  | 31 |
| 8  | 0 | 8  | 1 | 9   | 1  | 9   | 2  |

**Supplemental Table 1** Expression of pluripotency genes across samples. Average normalized expression values across groups of similar samples for unique genes and unannotated probe sets identified as being highly expressed in pluripotent cells over specified somatic cells (Figure 3B). Note: in the event that more than one probe set for a single gene was identified, the probe set with the highest overall expression was selected.
